# Supplementary material for: Solvates of a dianisyl-substituted donor–acceptor-type benzothiadiazole: mechanochromic, vapochromic, and acid-responsive multicolor luminescence
Source: Royal Society of Chemistry journal article supplement (doi:10.1039/d2ce01705a), 2023-01-01

## Solvates of a dianisyl-substituted donor–acceptor-type benzothiadiazole: mechanochromic, vapo-chromic, and acid-responsive multicolor luminescence

Takumi Yagi,<sup>a</sup> Takashi Tachikawa<sup>b,c</sup> and Suguru Ito<sup>\*a,d</sup>

<sup>a</sup> Department of Chemistry and Life Science, Graduate School of Engineering Science,  
Yokohama National University  
79-5 Tokiwadai, Hodogaya-ku, Yokohama 240-8501, Japan

\*E-mail: suguru-ito@ynu.ac.jp

<sup>b</sup> Department of Chemistry, Graduate School of Science, Kobe University,  
1-1 Rokkodai-cho, Nada-ku, Kobe 657-8501, Japan

<sup>c</sup> Molecular Photoscience Research Center, Kobe University,  
1-1 Rokkodai-cho, Nada-ku, Kobe 657-8501, Japan

<sup>d</sup> PRESTO, Japan Science and Technology Agency (JST),  
4-1-8 Honcho, Kawaguchi, Saitama 332-0012, Japan

### Table of contents

|                                                                                      |     |
|--------------------------------------------------------------------------------------|-----|
| 1. Fluorescence spectra of <b>1</b> in solution.....                                 | S2  |
| 2. Single-crystal X-ray diffraction analyses.....                                    | S3  |
| 3. Absorption spectra for crystalline <b>1</b> and <b>1•Solvent</b> .....            | S6  |
| 4. Theoretical calculations .....                                                    | S7  |
| 5. Fluorescence spectra for the MCL of <b>1•Solvent</b> .....                        | S8  |
| 6. Powder X-ray diffraction (PXRD) patterns for the MCL of <b>1•Solvent</b> .....    | S11 |
| 7. <sup>1</sup> H NMR spectra of <b>1•Benzene</b> .....                              | S12 |
| 8. Supplemental data for the acid-responsive luminescence of <b>1•Pyridine</b> ..... | S13 |
| Reference.....                                                                       | S16 |
| <sup>1</sup> H and <sup>13</sup> C NMR spectra.....                                  | S17 |

## 1. Fluorescence spectra of **1** in solution

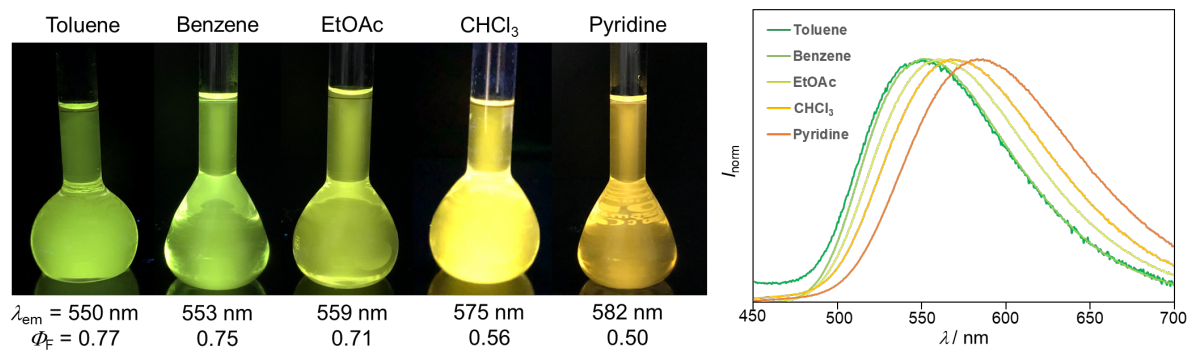

**Fig. S1** Photographs and fluorescence spectra of **1** in solvents ( $\lambda_{ex} = 365$  nm).

## 2. Single-crystal X-ray diffraction analyses

**Table S1.** Selected crystallographic data of **1** and **1•Solvent**

|                                                              | <b>1•CHCl<sub>3</sub></b>                                                        | <b>1•Benzene</b>                                                                             | <b>1•Pyridine</b>                                                                              | <b>1•EtOAc</b>                                                            | <b>1•Toluene</b>                                                                             | <b>1</b>                                                          |
|--------------------------------------------------------------|----------------------------------------------------------------------------------|----------------------------------------------------------------------------------------------|------------------------------------------------------------------------------------------------|---------------------------------------------------------------------------|----------------------------------------------------------------------------------------------|-------------------------------------------------------------------|
| Empirical formula                                            | C <sub>35</sub> H <sub>24</sub> N <sub>4</sub> O <sub>5</sub> •CHCl <sub>3</sub> | C <sub>35</sub> H <sub>24</sub> N <sub>4</sub> O <sub>5</sub> •C <sub>6</sub> H <sub>6</sub> | C <sub>35</sub> H <sub>24</sub> N <sub>4</sub> O <sub>5</sub> •C <sub>5</sub> H <sub>5</sub> N | C <sub>35</sub> H <sub>24</sub> N <sub>4</sub> O <sub>5</sub> •(+solvent) | C <sub>35</sub> H <sub>24</sub> N <sub>4</sub> O <sub>5</sub> •C <sub>7</sub> H <sub>8</sub> | C <sub>35</sub> H <sub>24</sub> N <sub>4</sub> O <sub>5</sub> S   |
| Formula weight                                               | 684.04                                                                           | 642.75                                                                                       | 643.76                                                                                         | 564.66                                                                    | 656.80                                                                                       | 564.66                                                            |
| Temperature / K                                              | 223                                                                              | 223.15                                                                                       | 223                                                                                            | 223                                                                       | 223                                                                                          | 223                                                               |
| Crystal system                                               | monoclinic                                                                       | monoclinic                                                                                   | monoclinic                                                                                     | monoclinic                                                                | triclinic                                                                                    | triclinic                                                         |
| Space group                                                  | <i>P</i> 2 <sub>1</sub> / <i>c</i> (#14)                                         | <i>C</i> 2/ <i>c</i> (#15)                                                                   | <i>C</i> 2/ <i>c</i> (#15)                                                                     | <i>P</i> 2 <sub>1</sub> / <i>c</i> (#14)                                  | <i>P</i> -1 (#2)                                                                             | <i>P</i> -1 (#2)                                                  |
| <i>a</i> / Å                                                 | 13.6322(2)                                                                       | 27.8666(4)                                                                                   | 27.6505(2)                                                                                     | 13.2848(2)                                                                | 11.62224(9)                                                                                  | 12.20306(9)                                                       |
| <i>b</i> / Å                                                 | 22.3975(3)                                                                       | 10.41560(10)                                                                                 | 10.34767(8)                                                                                    | 21.9654(3)                                                                | 14.66776(11)                                                                                 | 21.16656(17)                                                      |
| <i>c</i> / Å                                                 | 10.78060(19)                                                                     | 23.2099(4)                                                                                   | 23.2526(2)                                                                                     | 10.92692(17)                                                              | 21.05256(16)                                                                                 | 22.98109(18)                                                      |
| $\alpha$ / °                                                 | 90.0000                                                                          | 90.0000                                                                                      | 90.0000                                                                                        | 90.0000                                                                   | 100.6593(6)                                                                                  | 69.0121(7)                                                        |
| $\beta$ / °                                                  | 111.601(2)                                                                       | 108.110(2)                                                                                   | 108.4906(10)                                                                                   | 111.8702(18)                                                              | 91.6602(6)                                                                                   | 87.5755(6)                                                        |
| $\gamma$ / °                                                 | 90.0000                                                                          | 90.0000                                                                                      | 90.0000                                                                                        | 90.0000                                                                   | 109.9863(7)                                                                                  | 87.6112(6)                                                        |
| <i>V</i> / Å <sup>3</sup>                                    | 3060.44(9)                                                                       | 6402.89(17)                                                                                  | 6309.54(9)                                                                                     | 2959.06(8)                                                                | 3297.98(5)                                                                                   | 5534.93(8)                                                        |
| <i>Z</i>                                                     | 4                                                                                | 8                                                                                            | 8                                                                                              | 4                                                                         | 4                                                                                            | 8                                                                 |
| <i>D</i> <sub>calcd</sub> / g cm <sup>-3</sup>               | 1.484                                                                            | 1.334                                                                                        | 1.355                                                                                          | 1.267                                                                     | 1.323                                                                                        | 1.355                                                             |
| $\mu$ / mm <sup>-1</sup>                                     | 3.691                                                                            | 1.246                                                                                        | 1.275                                                                                          | 1.275                                                                     | 1.221                                                                                        | 1.363                                                             |
| <i>F</i> (000)                                               | 1408.00                                                                          | 2688.00                                                                                      | 2688.00                                                                                        | 1176.00                                                                   | 1376.00                                                                                      | 2352.00                                                           |
| Crystal size / mm <sup>3</sup>                               | 0.700 × 0.500 × 0.010                                                            | 0.7 × 0.5 × 0.01                                                                             | 0.700 × 0.500 × 0.010                                                                          | 0.100 × 0.010 × 0.010                                                     | 0.300 × 0.200 × 0.100                                                                        | 0.200 × 0.100 × 0.010                                             |
| Radiation                                                    | CuK $\alpha$ ( $\lambda$ = 1.54184 Å)                                            | CuK $\alpha$ ( $\lambda$ = 1.54184 Å)                                                        | CuK $\alpha$ ( $\lambda$ = 1.54184 Å)                                                          | CuK $\alpha$ ( $\lambda$ = 1.54184 Å)                                     | CuK $\alpha$ ( $\lambda$ = 1.54184 Å)                                                        | CuK $\alpha$ ( $\lambda$ = 1.54184 Å)                             |
| 2 $\theta$ range for data collection / °                     | 7.894 to 136.486                                                                 | 8.016 to 146.42                                                                              | 8.018 to 136.474                                                                               | 9.606 to 136.500                                                          | 8.136 to 136.464                                                                             | 7.852 to 136.494                                                  |
| Index ranges                                                 | -16 ≤ <i>h</i> ≤ 16<br>-26 ≤ <i>k</i> ≤ 20<br>-12 ≤ <i>l</i> ≤ 10                | -33 ≤ <i>h</i> ≤ 31<br>-12 ≤ <i>k</i> ≤ 12<br>-25 ≤ <i>l</i> ≤ 28                            | -33 ≤ <i>h</i> ≤ 31<br>-12 ≤ <i>k</i> ≤ 6<br>-27 ≤ <i>l</i> ≤ 28                               | -13 ≤ <i>h</i> ≤ 15<br>-26 ≤ <i>k</i> ≤ 25<br>-13 ≤ <i>l</i> ≤ 13         | -13 ≤ <i>h</i> ≤ 14<br>-17 ≤ <i>k</i> ≤ 17<br>-25 ≤ <i>l</i> ≤ 22                            | -14 ≤ <i>h</i> ≤ 14<br>-23 ≤ <i>k</i> ≤ 25<br>-18 ≤ <i>l</i> ≤ 27 |
| Reflections collected                                        | 18142                                                                            | 17502                                                                                        | 19744                                                                                          | 18511                                                                     | 46430                                                                                        | 73764                                                             |
| Independent reflections                                      | 5603 [ <i>R</i> <sub>int</sub> = 0.0580]                                         | 6248 [ <i>R</i> <sub>int</sub> = 0.0459]                                                     | 5778 [ <i>R</i> <sub>int</sub> = 0.0247]                                                       | 5402 [ <i>R</i> <sub>int</sub> = 0.0288]                                  | 12036 [ <i>R</i> <sub>int</sub> = 0.0567]                                                    | 20185 [ <i>R</i> <sub>int</sub> = 0.0323]                         |
| Data / restraints / parameters                               | 5603/0/415                                                                       | 6248/0/401                                                                                   | 5778/0/433                                                                                     | 5402/0/379                                                                | 12036/0/883                                                                                  | 20185/0/1513                                                      |
| Goodness-of-fit on <i>F</i> <sup>2</sup>                     | 1.066                                                                            | 1.071                                                                                        | 1.052                                                                                          | 1.057                                                                     | 1.065                                                                                        | 1.037                                                             |
| Final <i>R</i> indexes [ <i>I</i> > 2 $\sigma$ ( <i>I</i> )] | <i>R</i> <sub>1</sub> = 0.0436, <i>wR</i> <sub>2</sub> = 0.1219                  | <i>R</i> <sub>1</sub> = 0.0533, <i>wR</i> <sub>2</sub> = 0.1488                              | <i>R</i> <sub>1</sub> = 0.0425, <i>wR</i> <sub>2</sub> = 0.1126                                | <i>R</i> <sub>1</sub> = 0.0425, <i>wR</i> <sub>2</sub> = 0.1081           | <i>R</i> <sub>1</sub> = 0.0491, <i>wR</i> <sub>2</sub> = 0.1362                              | <i>R</i> <sub>1</sub> = 0.0608, <i>wR</i> <sub>2</sub> = 0.1731   |
| Final <i>R</i> indexes [all data]                            | <i>R</i> <sub>1</sub> = 0.0470, <i>wR</i> <sub>2</sub> = 0.1252                  | <i>R</i> <sub>1</sub> = 0.0570, <i>wR</i> <sub>2</sub> = 0.1521                              | <i>R</i> <sub>1</sub> = 0.0449, <i>wR</i> <sub>2</sub> = 0.1145                                | <i>R</i> <sub>1</sub> = 0.0458, <i>wR</i> <sub>2</sub> = 0.1106           | <i>R</i> <sub>1</sub> = 0.0533, <i>wR</i> <sub>2</sub> = 0.1400                              | <i>R</i> <sub>1</sub> = 0.0670, <i>wR</i> <sub>2</sub> = 0.1783   |
| Largest diff. peak/hole / eÅ <sup>-3</sup>                   | 0.26/-0.42                                                                       | 0.35/-0.43                                                                                   | 0.48/-0.53                                                                                     | 0.30/-0.54                                                                | 0.54/-0.39                                                                                   | 1.77/-0.61                                                        |

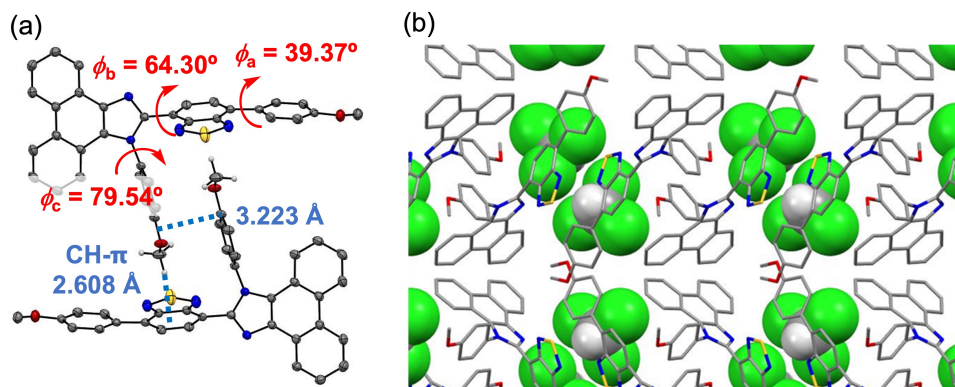

**Fig. S2** The crystal structure of **1•CHCl<sub>3</sub>** (Color code: gray = C, red = O, blue = N, yellow = S, green = Cl). (a) Adjacent two molecules with atomic displacement parameters set at 50% probability. (b) Packing structure. Solvate molecules are represented with space-filling model.

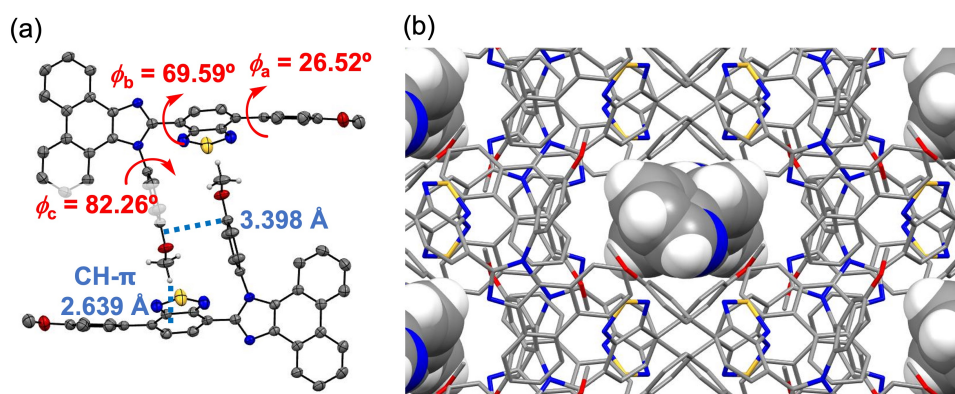

**Fig. S3** The crystal structure of **1•Pyridine** (Color code: gray = C, red = O, blue = N, yellow = S). (a) Adjacent two molecules with atomic displacement parameters set at 50% probability. (b) Packing structure viewed along *c*-axis. Solvate molecules are represented with space-filling model.

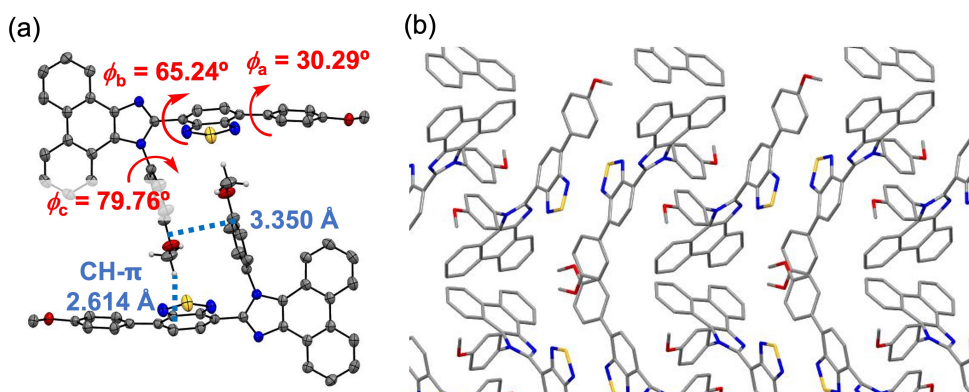

**Fig. S4** The crystal structure of **1•EtOAc** (Color code: gray = C, red = O, blue = N, yellow = S). (a) Adjacent two molecules with atomic displacement parameters set at 50% probability. (b) Packing structure viewed along *c*-axis.

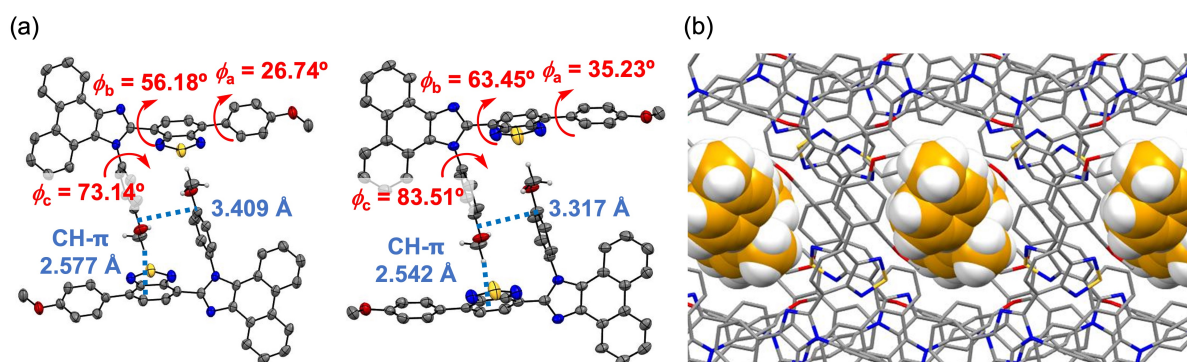

**Fig. S5** The crystal structure of **1•Toluene** (Color code: gray = C, red = O, blue = N, yellow = S). (a) Adjacent two molecules with atomic displacement parameters set at 50% probability. Crystallographically independent two pairs are shown. (b) Packing structure viewed along *c*-axis. Solvate molecules are represented with space-filling model. Carbon atoms of solvate molecules are shown in orange.

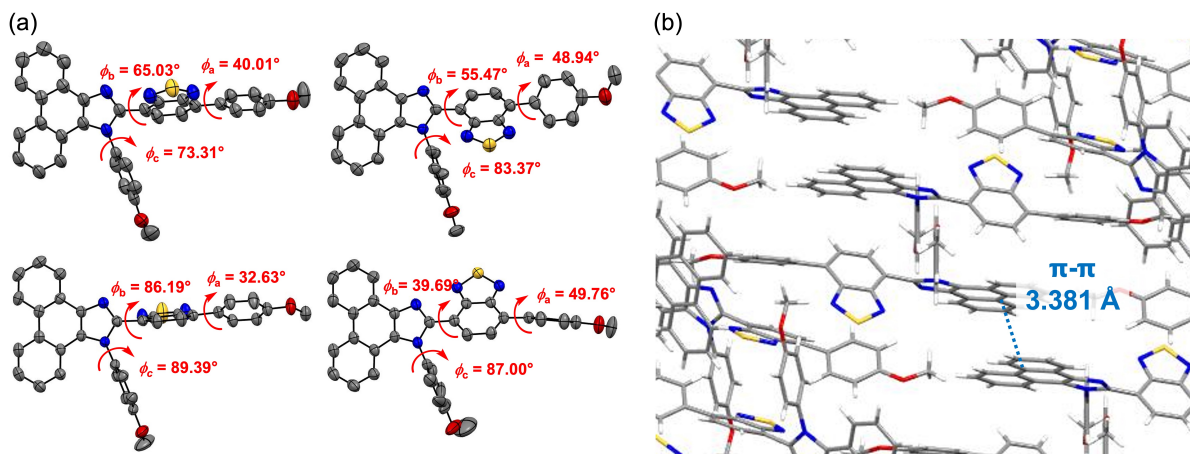

**Fig. S6** The crystal structure of **1** with atomic displacement parameters set at 50% probability (Color code: gray = C, red = O, blue = N, yellow = S). (a) Four crystallographically independent molecules of **1**. (b) Packing structure of **1**.

### 3. Absorption spectra for crystalline **1** and **1**•Solvent

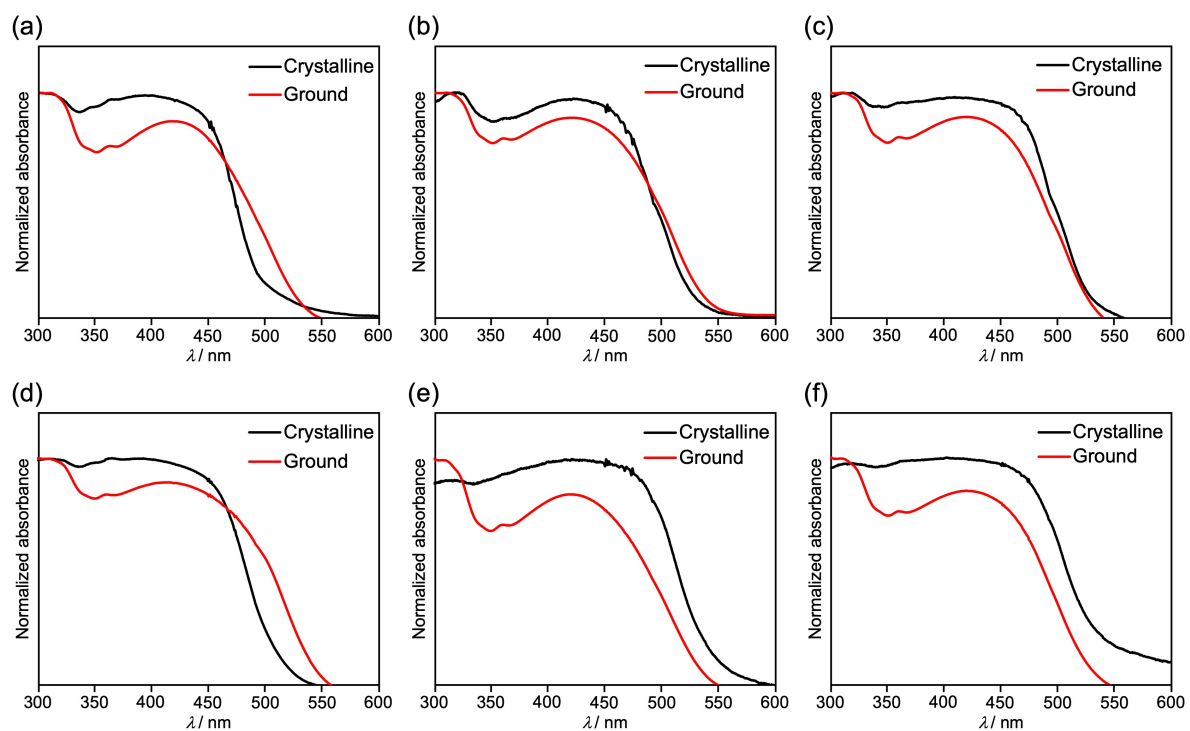

**Fig. S7** Solid-state absorption spectra of **1**•CHCl<sub>3</sub> (a), **1**•Benzene (b), **1**•Pyridine (c), **1**•EtOAc (d), **1**•Toluene (e), and **1** (f).

## 4. Theoretical calculations

**Table S2** Experimental fluorescence maxima and calculated absorption properties of X-ray structures for **1** and **1•Solvent**.

| Compd.                    | Crystalline $\lambda_{em}$ (nm) | Calcd $\lambda_{abs}$ (nm) | Transition from HOMO to LUMO | Oscillator strength | HOMO (eV) | LUMO (eV) | Dipole moment (D) |
|---------------------------|---------------------------------|----------------------------|------------------------------|---------------------|-----------|-----------|-------------------|
| <b>1•CHCl<sub>3</sub></b> | 508                             | 373                        | 0.622                        | 0.390               | -6.37     | -1.17     | 5.03              |
| <b>1•Benzene</b>          | 521                             | 379                        | 0.607                        | 0.422               | -6.36     | -1.19     | 5.20              |
| <b>1•Pyridine</b>         | 522                             | 377                        | 0.607                        | 0.408               | -6.37     | -1.20     | 5.23              |
| <b>1•EtOAc</b>            | 524                             | 381                        | 0.614                        | 0.428               | -6.36     | -1.20     | 5.25              |
| <b>1•Toluene</b>          | 565                             | 382                        | 0.624                        | 0.471               | -6.35     | -1.18     | 5.23              |
| <b>1</b>                  | 550                             | 371                        | 0.640                        | 0.396               | -6.42     | -1.17     | 3.34              |

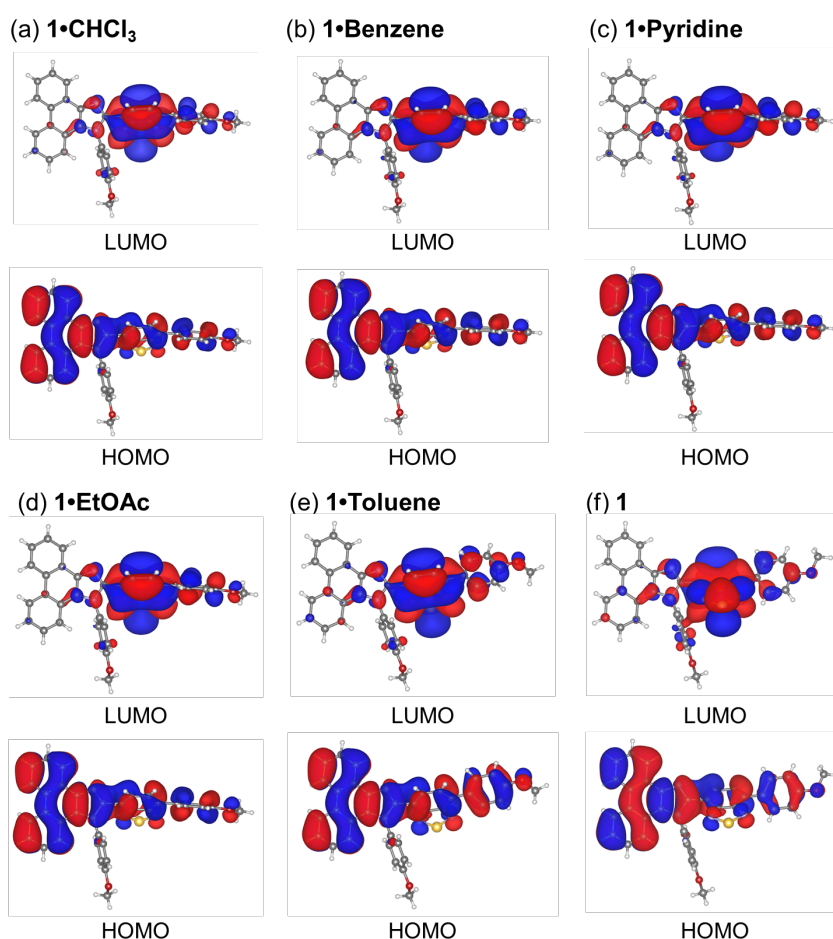

**Fig. S8** HOMO and LUMO of **1** in crystalline **1•CHCl<sub>3</sub>** (a), **1•Benzene** (b), **1•Pyridine** (c), **1•EtOAc** (d), **1•Toluene** (e), and **1** (f) calculated at the CAM-B3LYP/6-31G(d) level. The structures are drawn by VESTA.<sup>1</sup>

## 5. Fluorescence spectra for the MCL of 1•Solvent

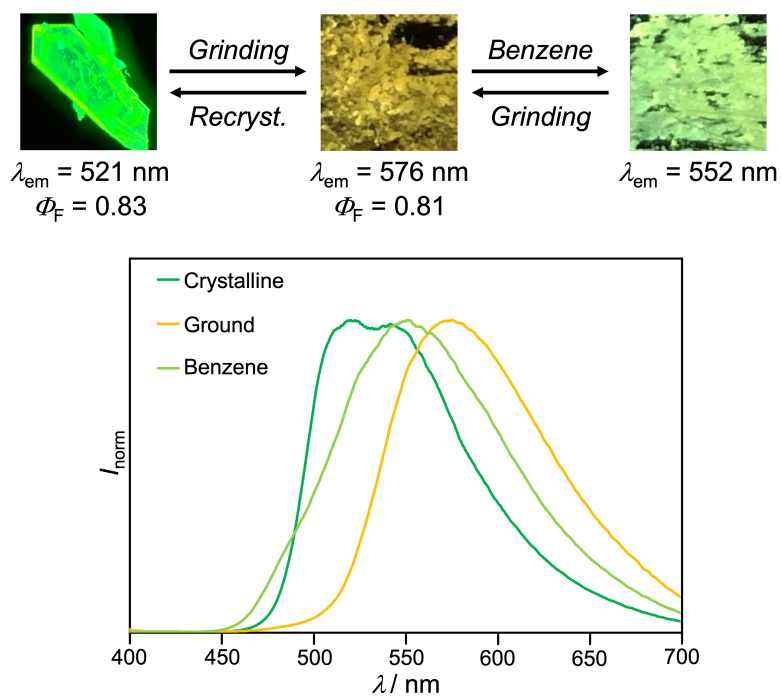

Fig. S9 Photographs and fluorescence spectra for the MCL of 1•Benzene.

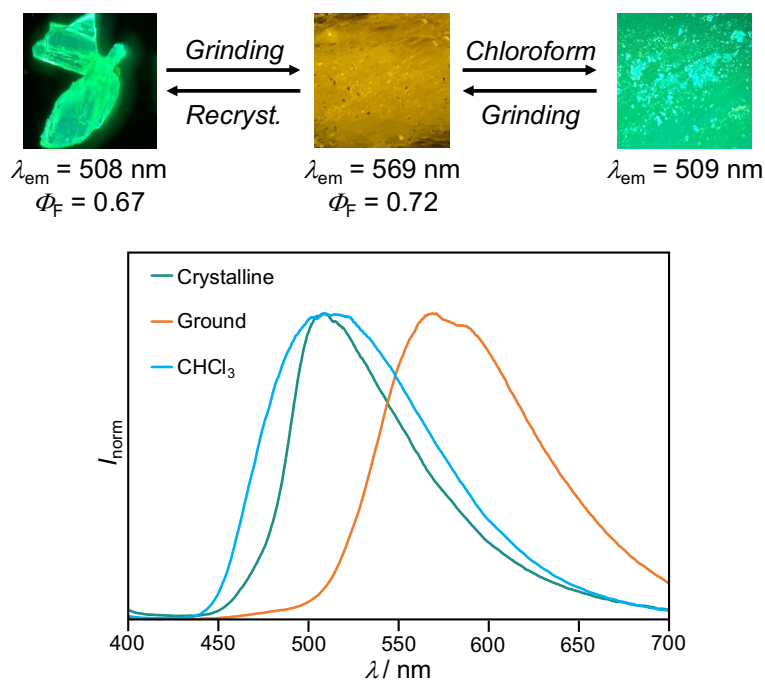

Fig. S10 Photographs and fluorescence spectra for the MCL of 1•CHCl<sub>3</sub>.



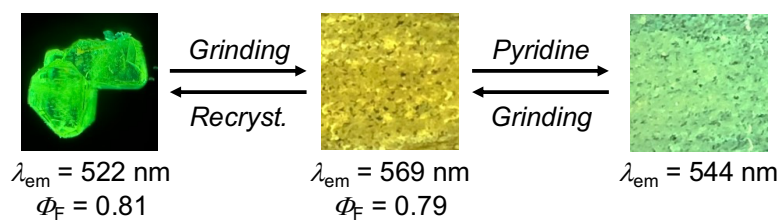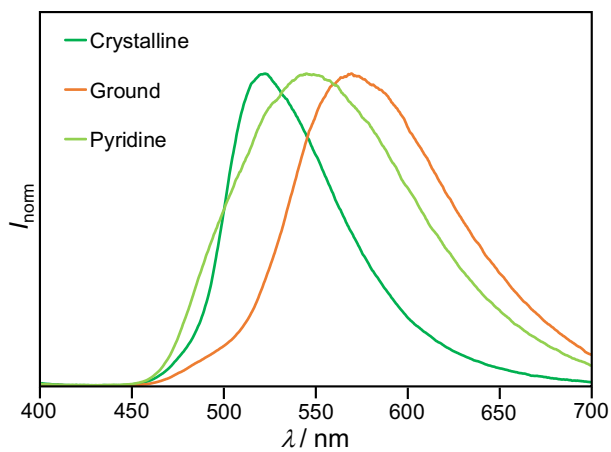

**Fig. S11** Photographs and fluorescence spectra for the MCL of **1•Pyridine**.

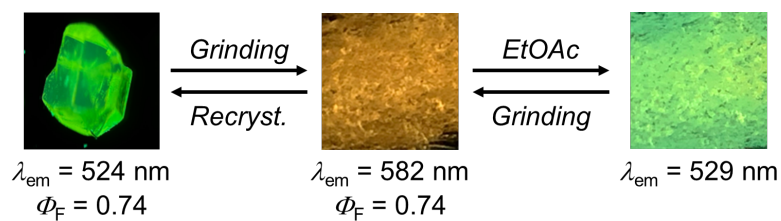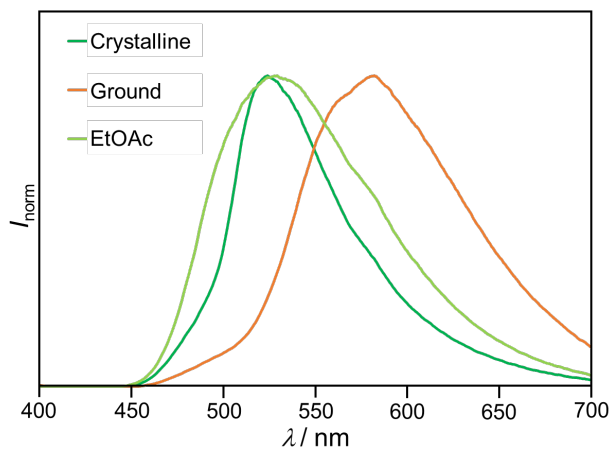

**Fig. S12** Photographs and fluorescence spectra for the MCL of **1•EtOAc**.

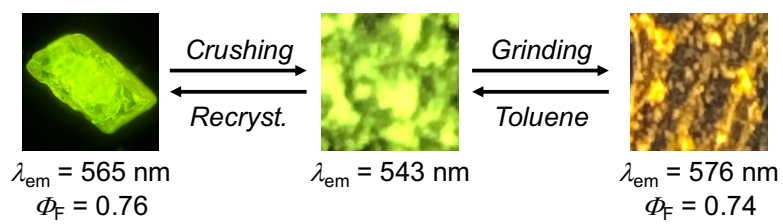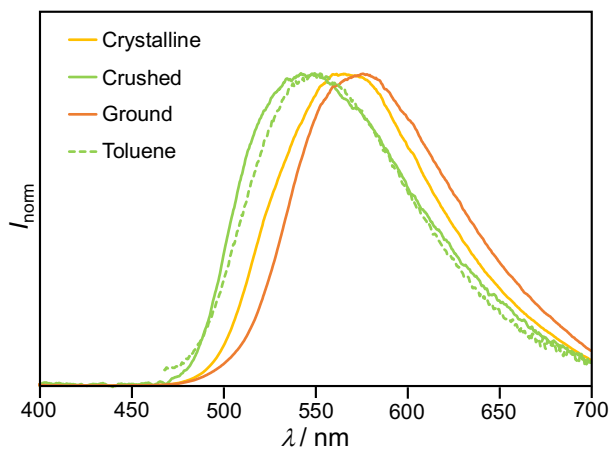

**Fig. S13** Photographs and fluorescence spectra for the MCL of **1•Toluene**.

## 6. Powder X-ray diffraction (PXRD) patterns for the MCL of 1•Solvent

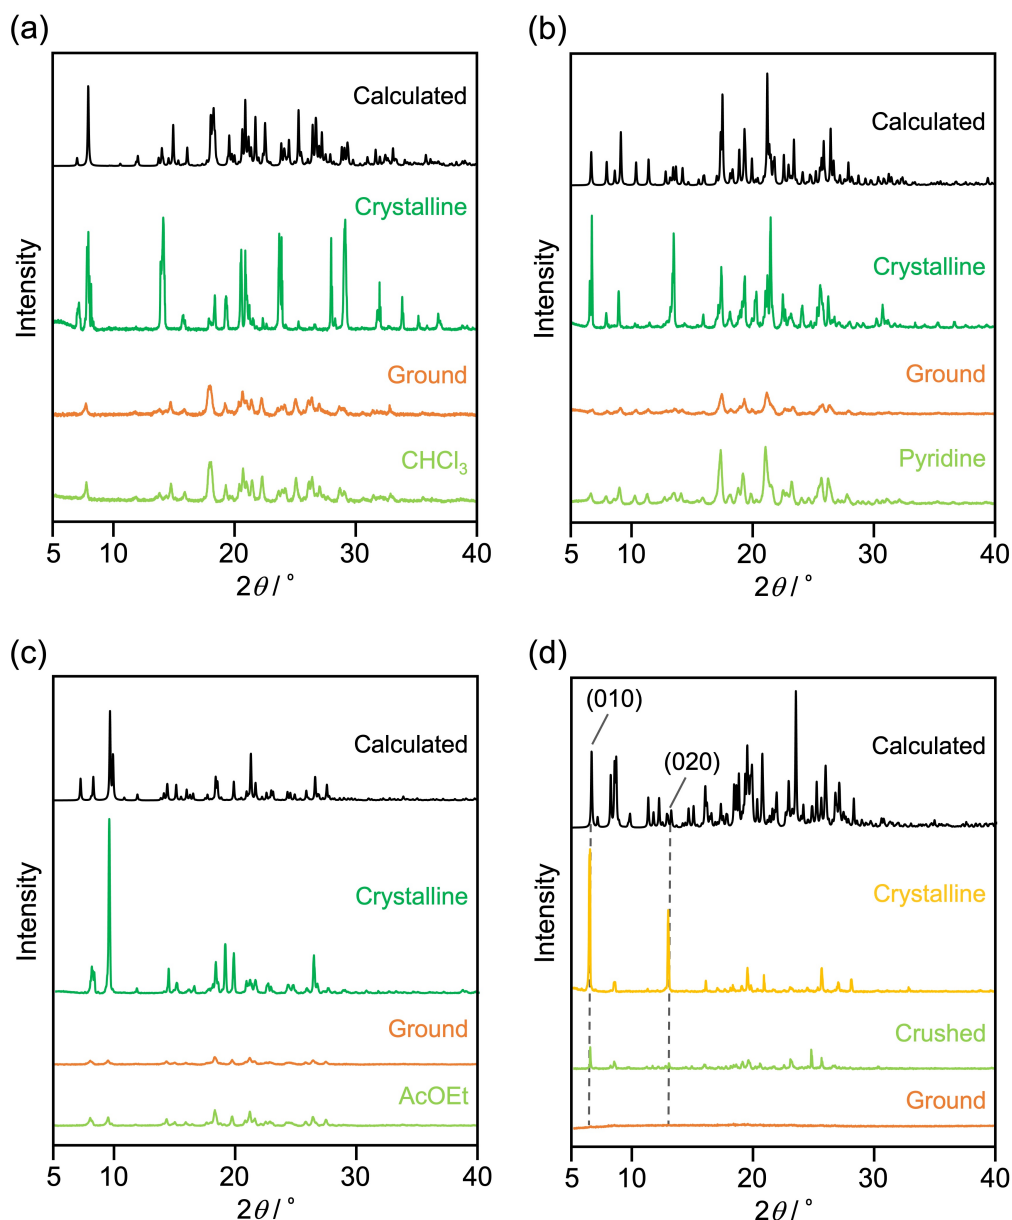

**Fig. S14** PXRD patterns for 1•CHCl<sub>3</sub> (a), 1•Pyridine (b), 1•EtOAc (c), and 1•Toluene (d). (a–c) Black lines: Simulated PXRD patterns calculated from the single-crystal structure. Green lines: Experimental PXRD patterns of the powdered crystalline samples. Orange lines: Experimental PXRD patterns of the ground samples. Yellow-green lines: Experimental PXRD patterns of the solvent-exposed samples. (d) Black line: Simulated PXRD patterns calculated from the single-crystal structure. Yellow line: Experimental PXRD patterns of the powdered crystalline sample. Yellow-green line: Experimental PXRD patterns of the crushed sample. Orange line: Experimental PXRD patterns of the ground sample.

## 7. $^1\text{H}$ NMR spectra of $1\bullet\text{Benzene}$

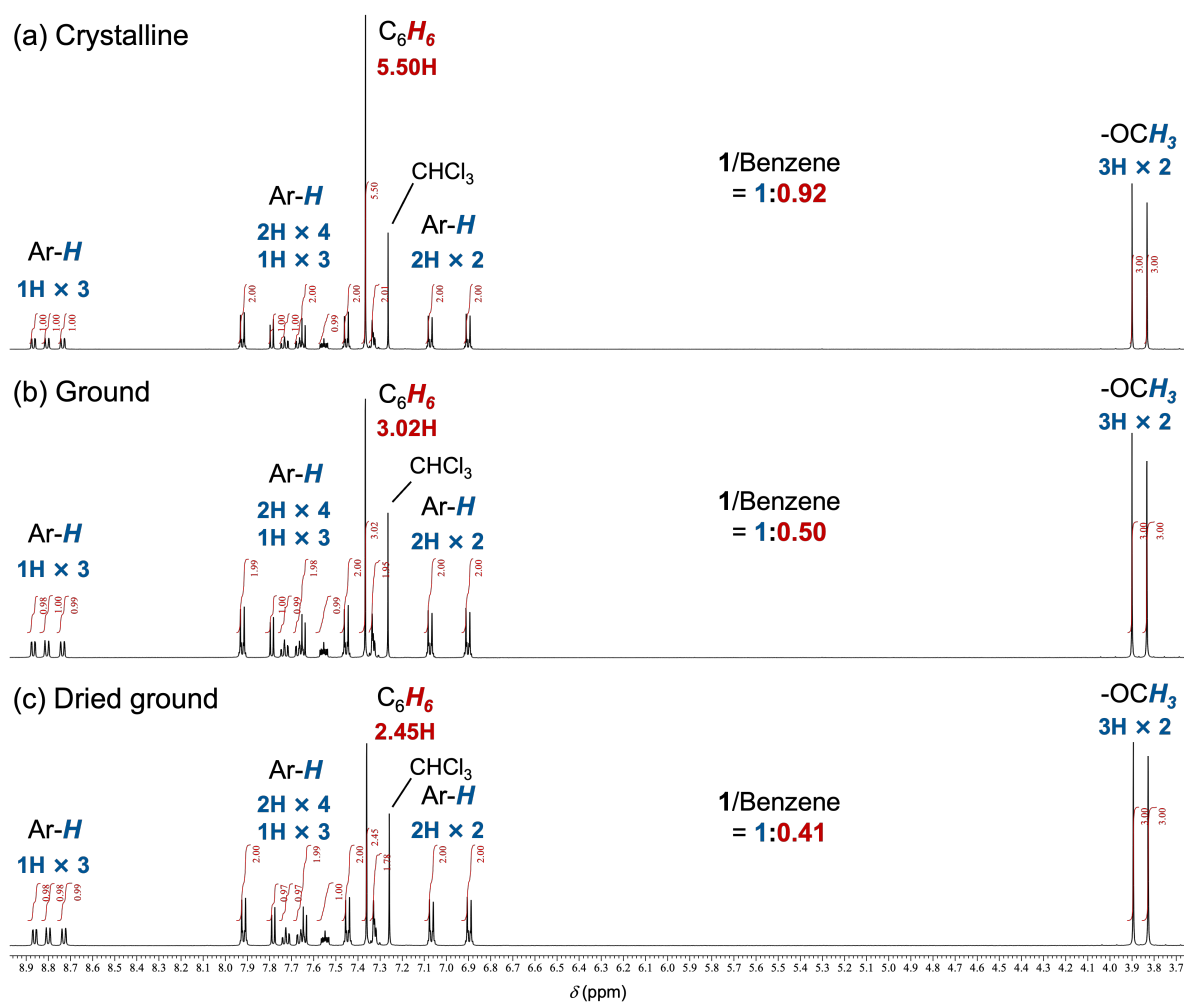

**Fig. S15**  $^1\text{H}$  NMR spectra (500 MHz, in  $\text{CDCl}_3$ , rt) of (a) crystalline  $1\bullet\text{Benzene}$ , (b) ground  $1\bullet\text{Benzene}$ , and (c) ground  $1\bullet\text{Benzene}$  after drying in vacuo for 6 h.

## 8. Supplemental data for the acid-responsive luminescence of **1**•Pyridine

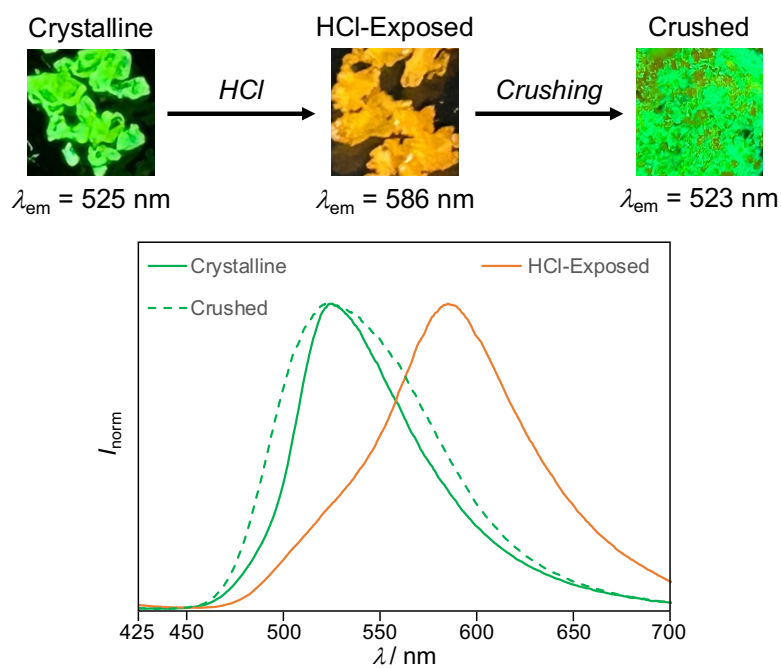

**Fig. S16** Photographs and fluorescence spectra for acid-responsive luminescence of **1**•Pyridine.

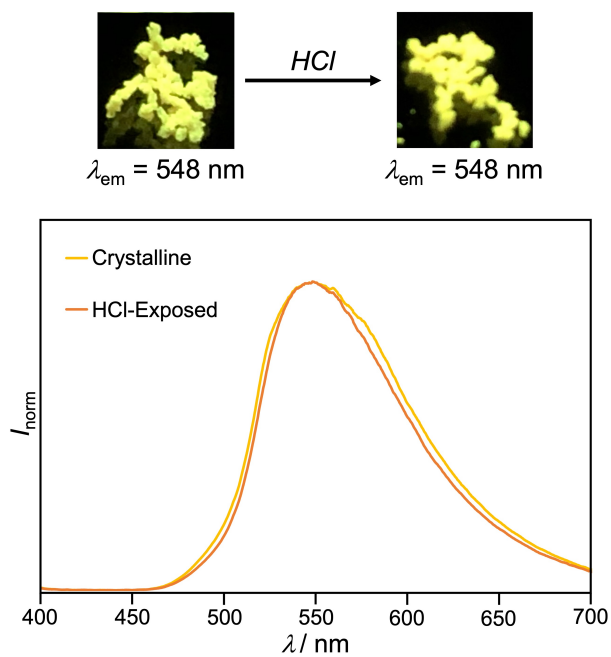

**Fig. S17** Photographs and fluorescence spectra for crystalline **1** and acid-exposed **1**.

X-ray photoelectron spectroscopy (XPS) suggested the presence of pyridine hydrochloride on the surface of HCl-exposed **1•Pyridine** (Fig. S18). Surface pyridine molecules should have volatilized from crystalline **1•Pyridine** prior to XPS measurement under high vacuum conditions (Fig. S18a), while a broad N 1s peak that should correspond to protonated pyridine salts was detected for the HCl-exposed sample (Fig. S18b). In addition, Cl 2p was detected for HCl-exposed **1•Pyridine** (Fig. S18c).

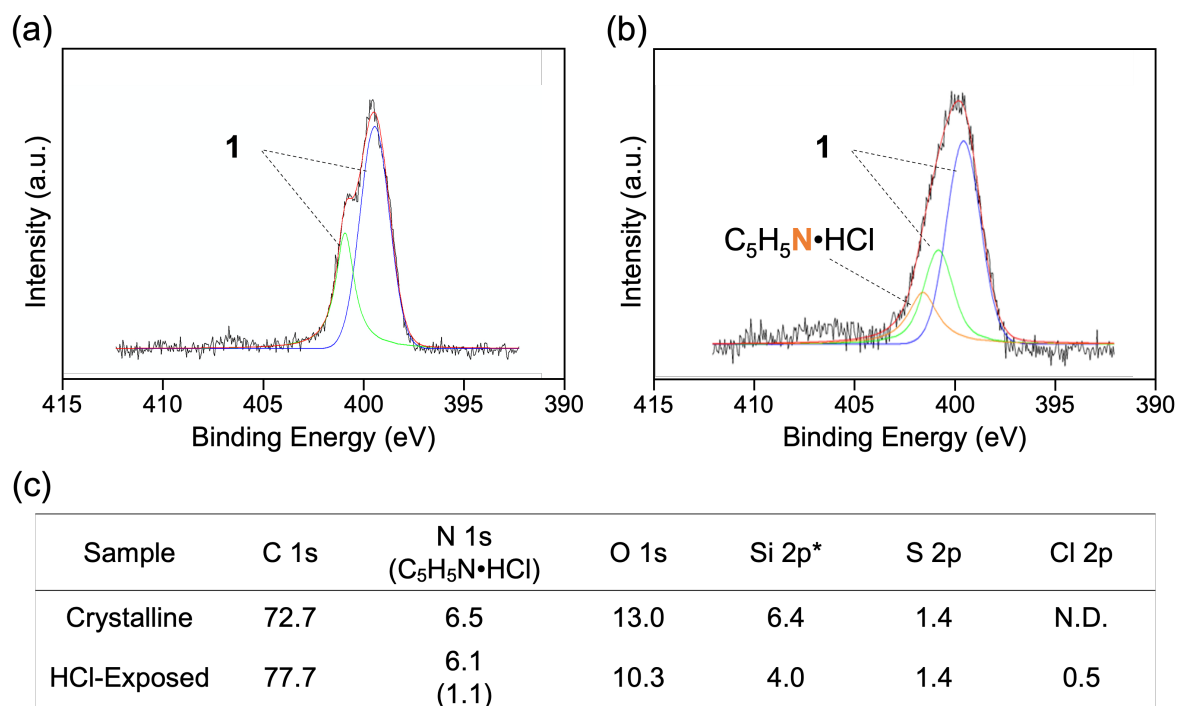

**Fig. S18** N 1s XPS spectra of crystalline **1•Pyridine** (a) and HCl-exposed **1•Pyridine** (b). (c) Atomic percentages (%) of the elements calculated from the XPS spectra of crystalline and HCl-exposed **1•Pyridine**.

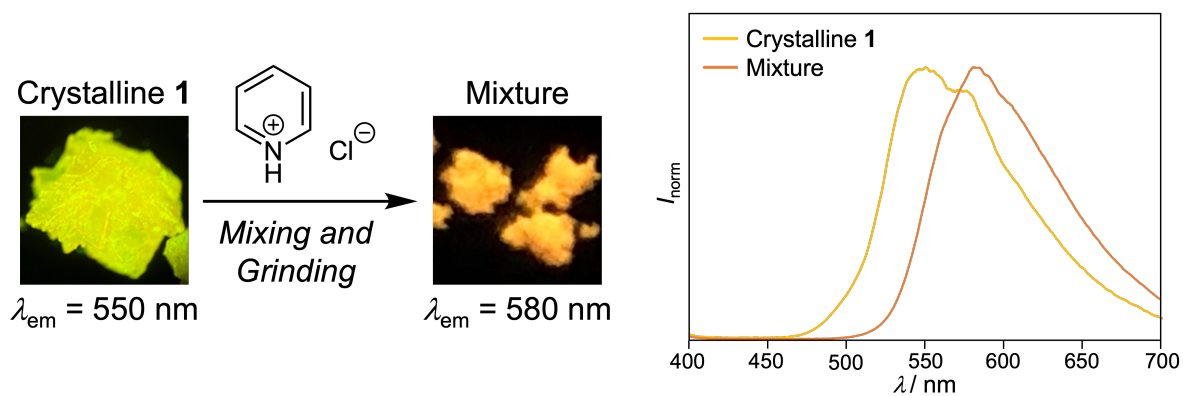

**Fig. S19** Photographs and fluorescence spectra for crystalline **1** and mixture of **1** and pyridine hydrochloride.

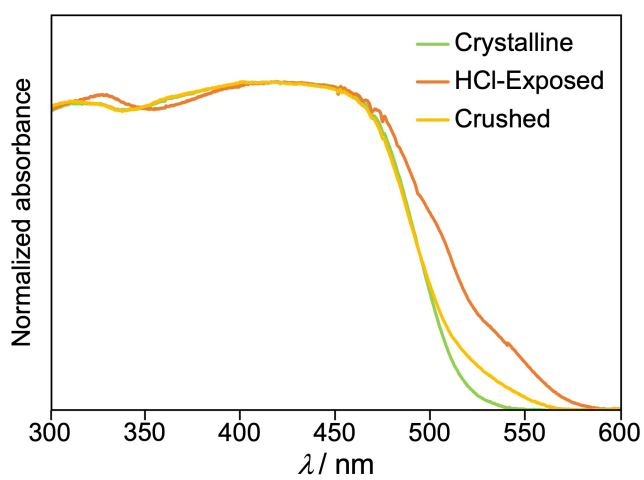

**Fig. S20** Solid-state absorption spectra of crystalline, HCl-exposed, and crushed **1**•Pyridine.

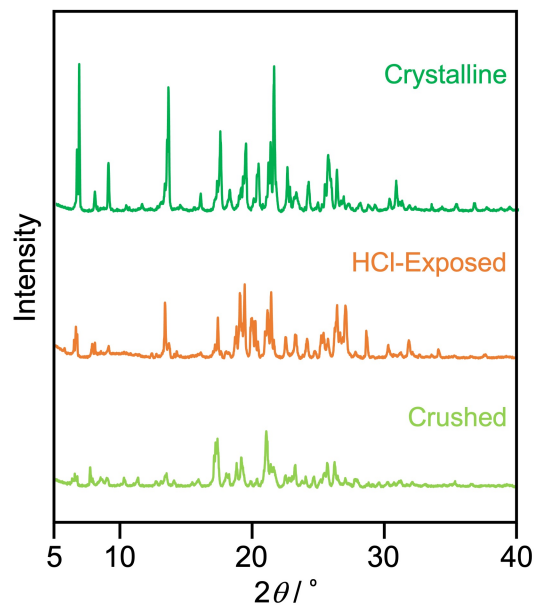

**Fig. S21** PXR D patterns of **1•Pyridine**. Green line: Experimental PXR D pattern of the powdered crystalline sample. Orange line: Experimental PXR D pattern of the HCl-exposed sample. Yellow-green line: Experimental PXR D pattern of the crushed samples.

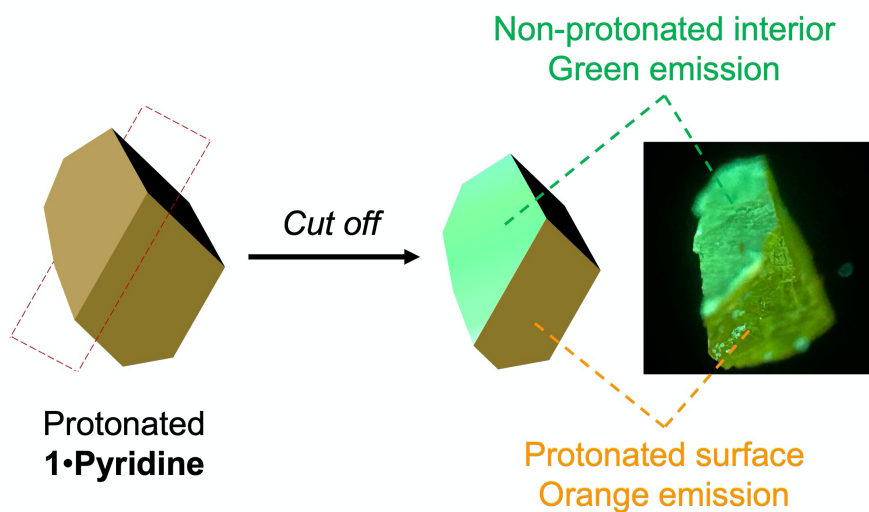

**Fig. S22** Schematic diagram and photograph for the cutting process of HCl-exposed **1•Pyridine**.

## Reference

- 1) K. Momma and F. Izumi, *J. Appl. Crystallogr.*, 2011, **44**, 1272.



<sup>1</sup>H NMR spectrum of **1** (500 MHz, CDCl<sub>3</sub>, rt)

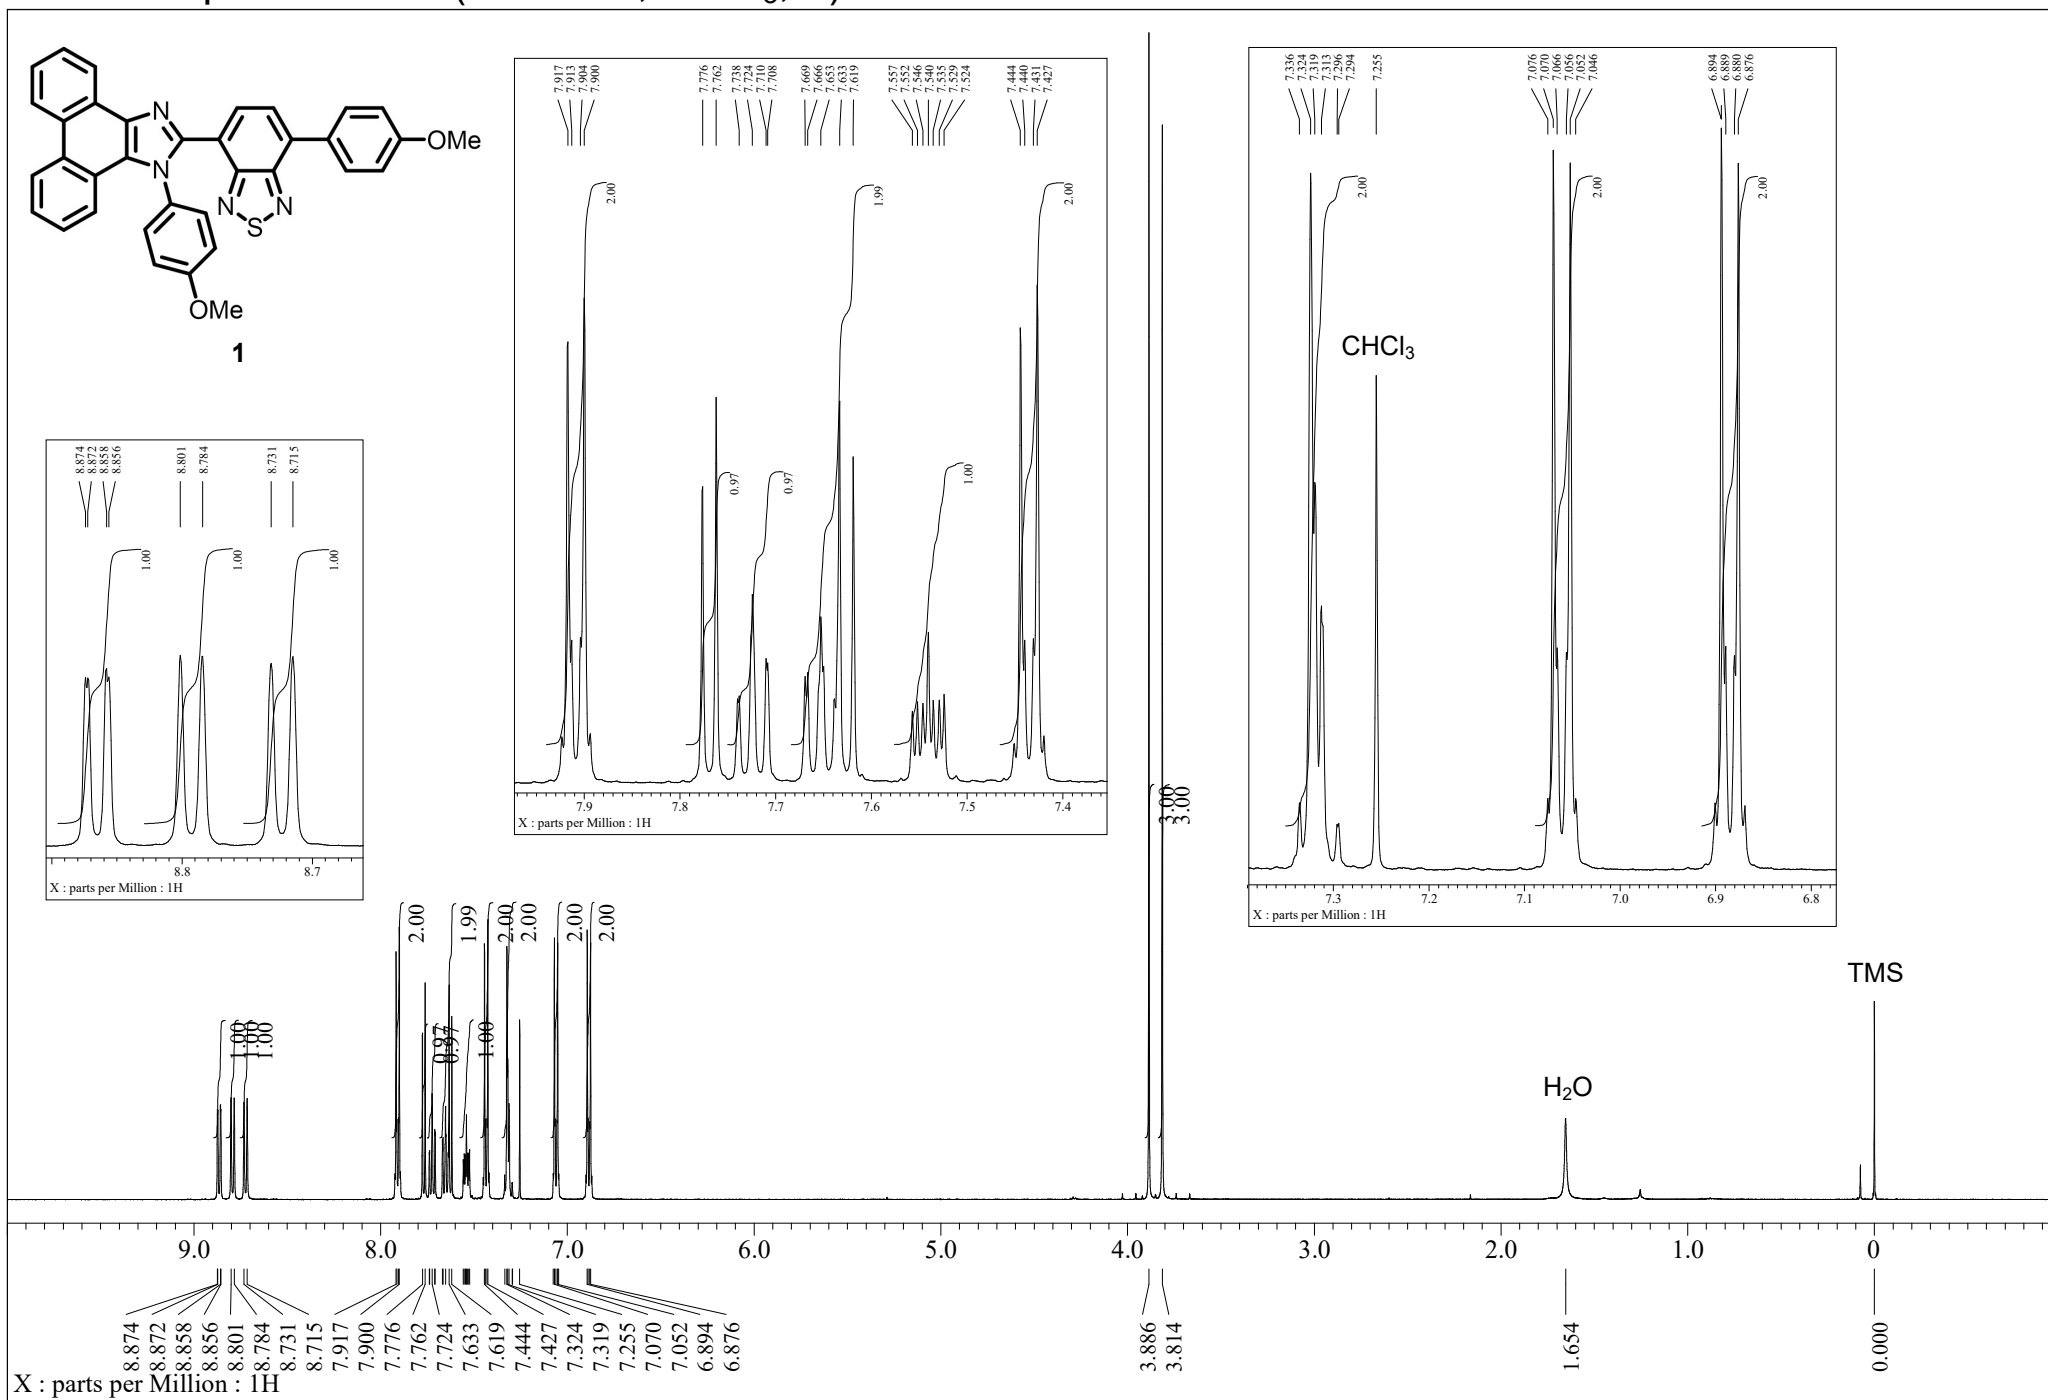

<sup>1</sup>H NMR spectrum of **1•Toluene** (500 MHz, CDCl<sub>3</sub>, rt)

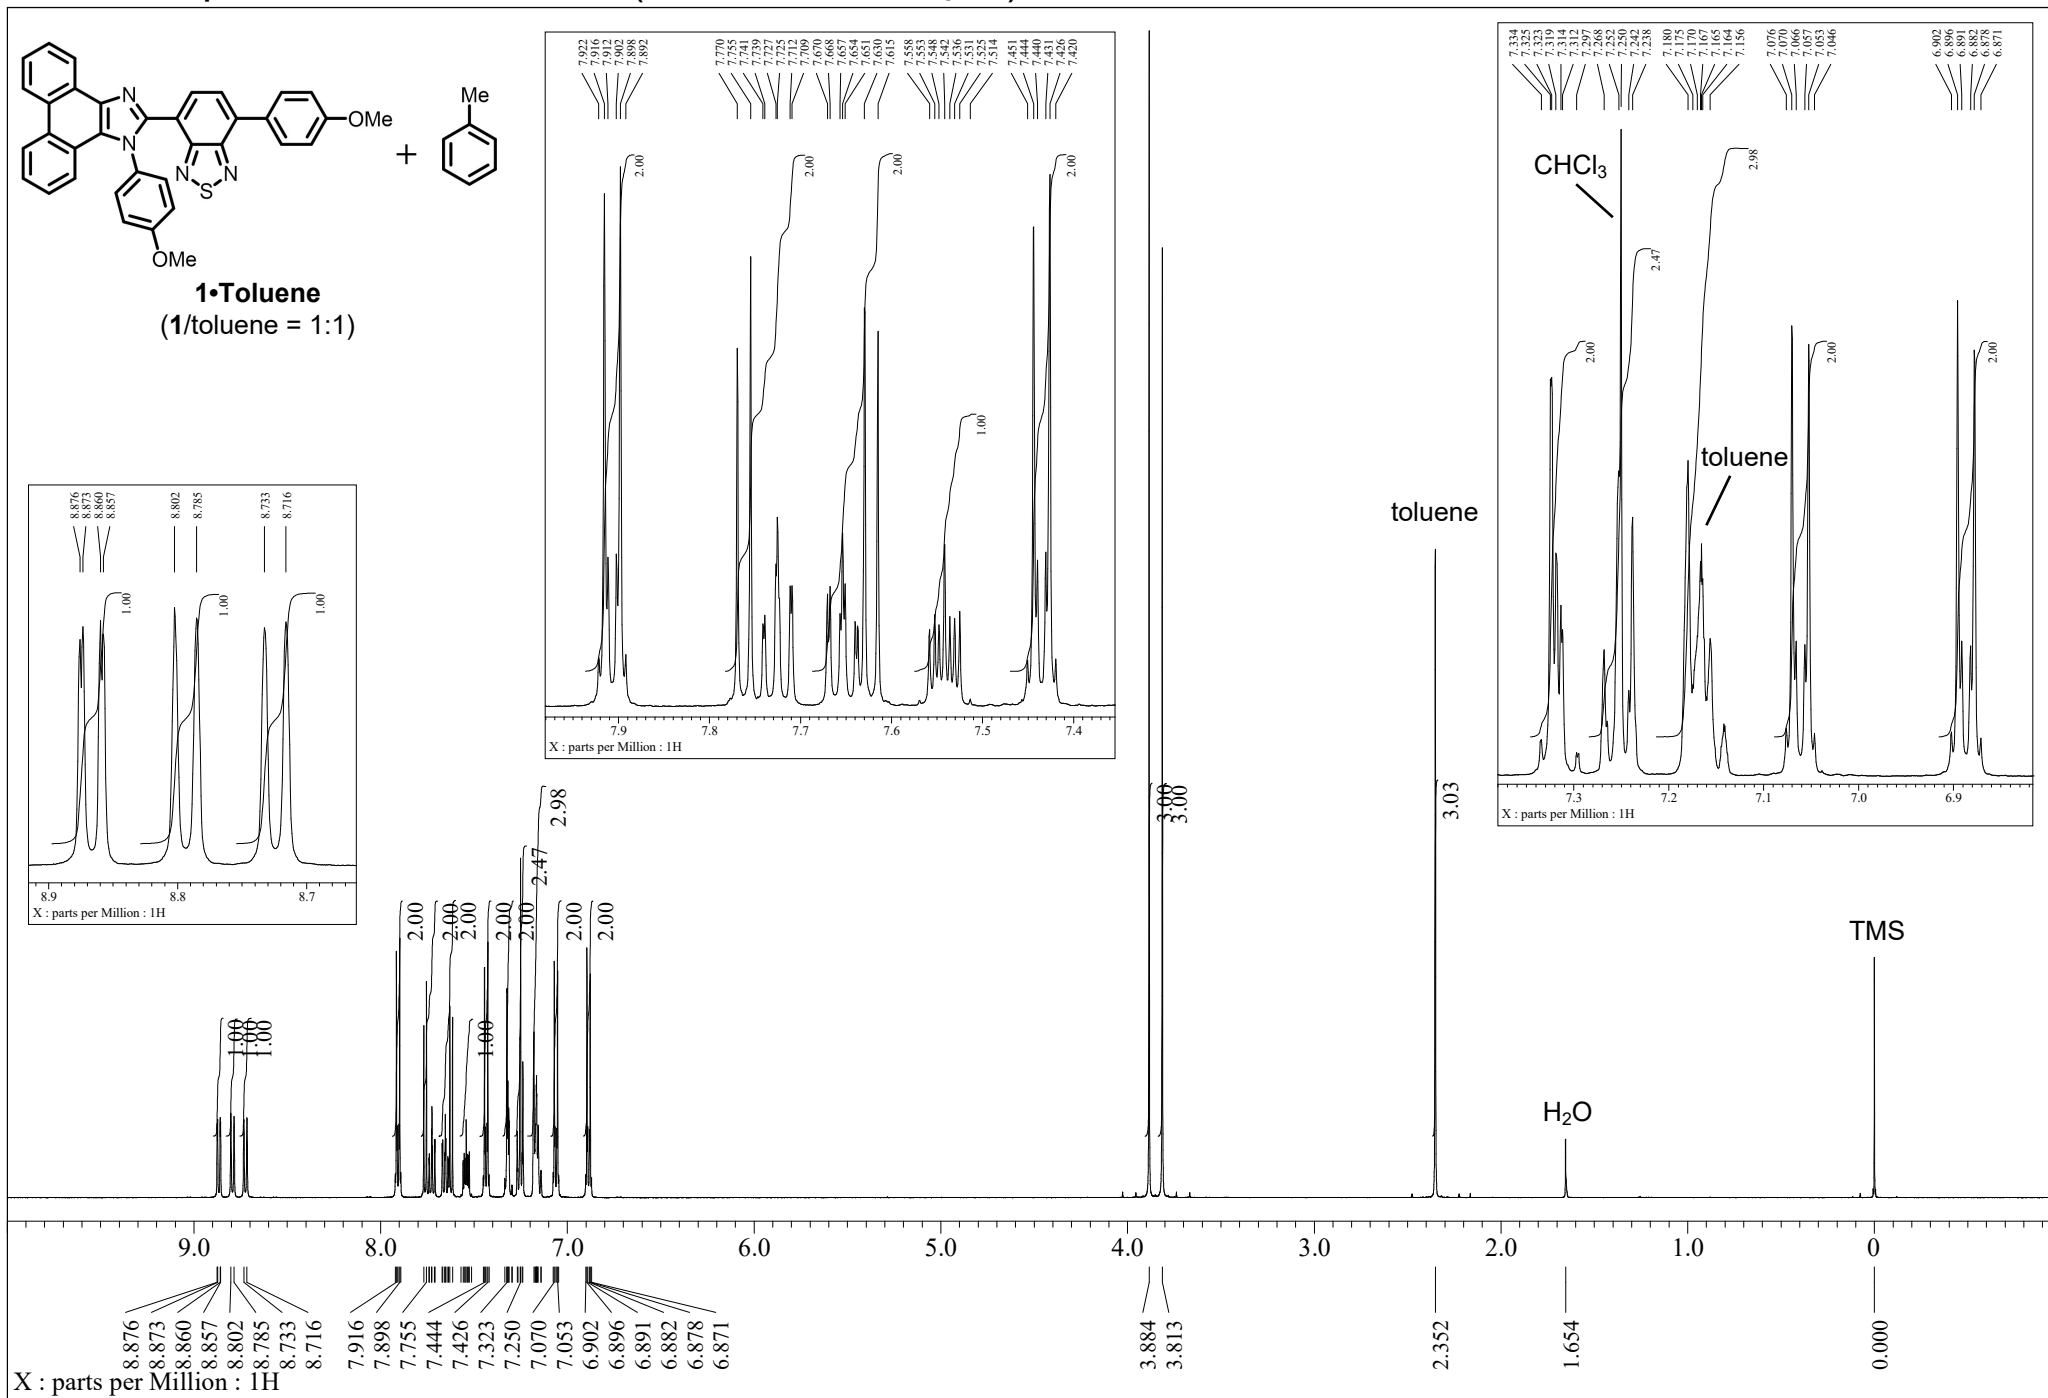

# $^1\text{H}$ NMR spectrum of **1**• $\text{CHCl}_3$ (500 MHz, $\text{C}_6\text{D}_6$ , rt)

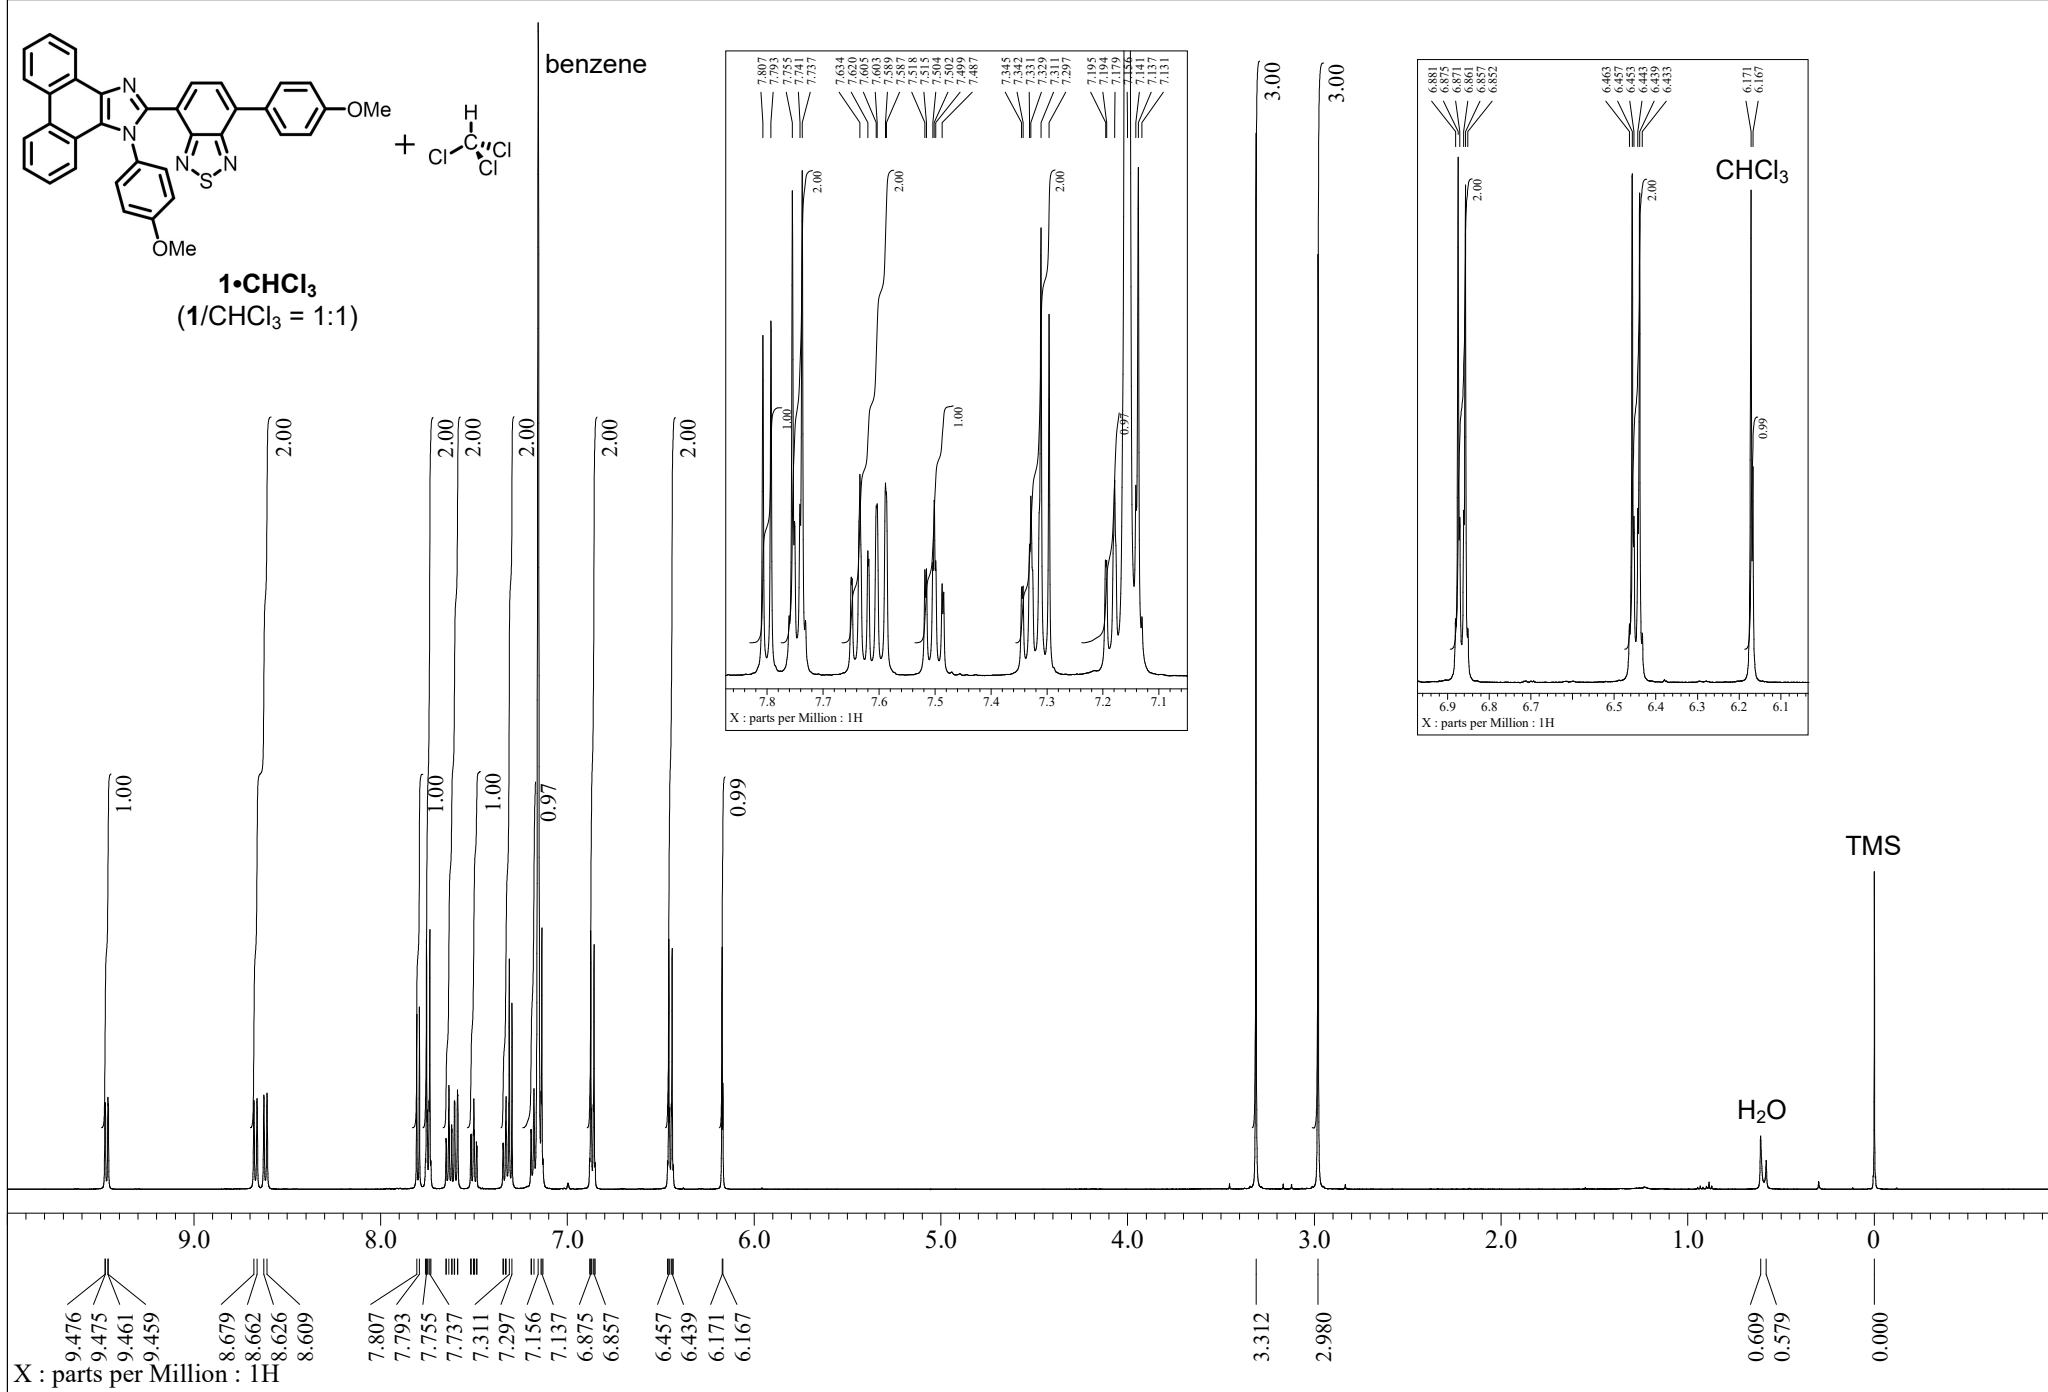

# <sup>1</sup>H NMR spectrum of **1•Benzene** (500 MHz, CDCl<sub>3</sub>, rt)

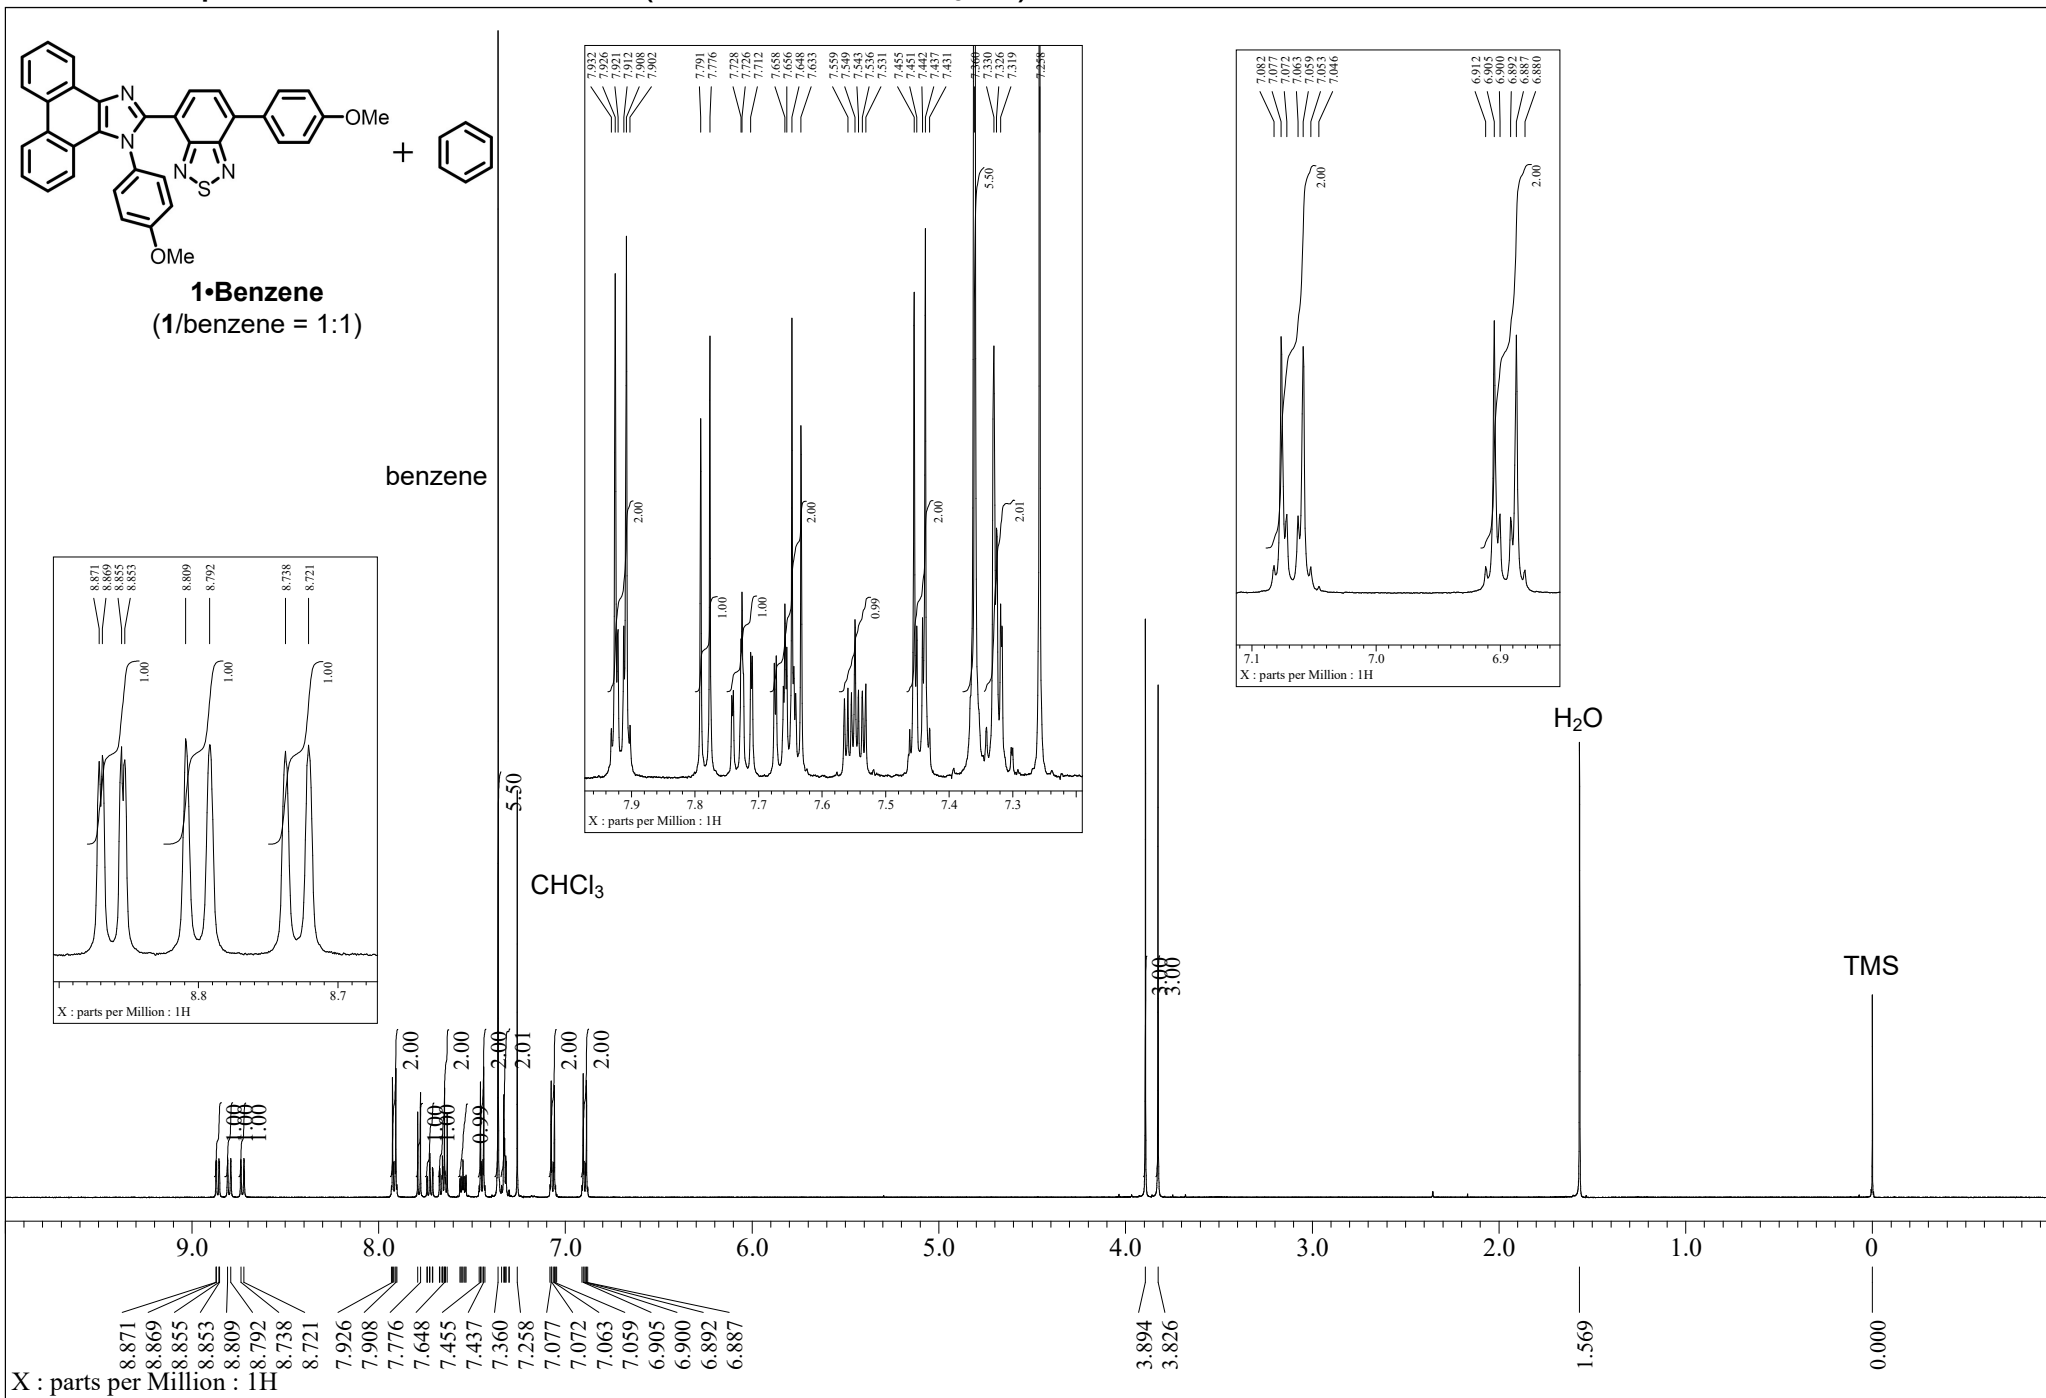

<sup>1</sup>H NMR spectrum of ground **1**•Benzene (500 MHz, CDCl<sub>3</sub>, rt)

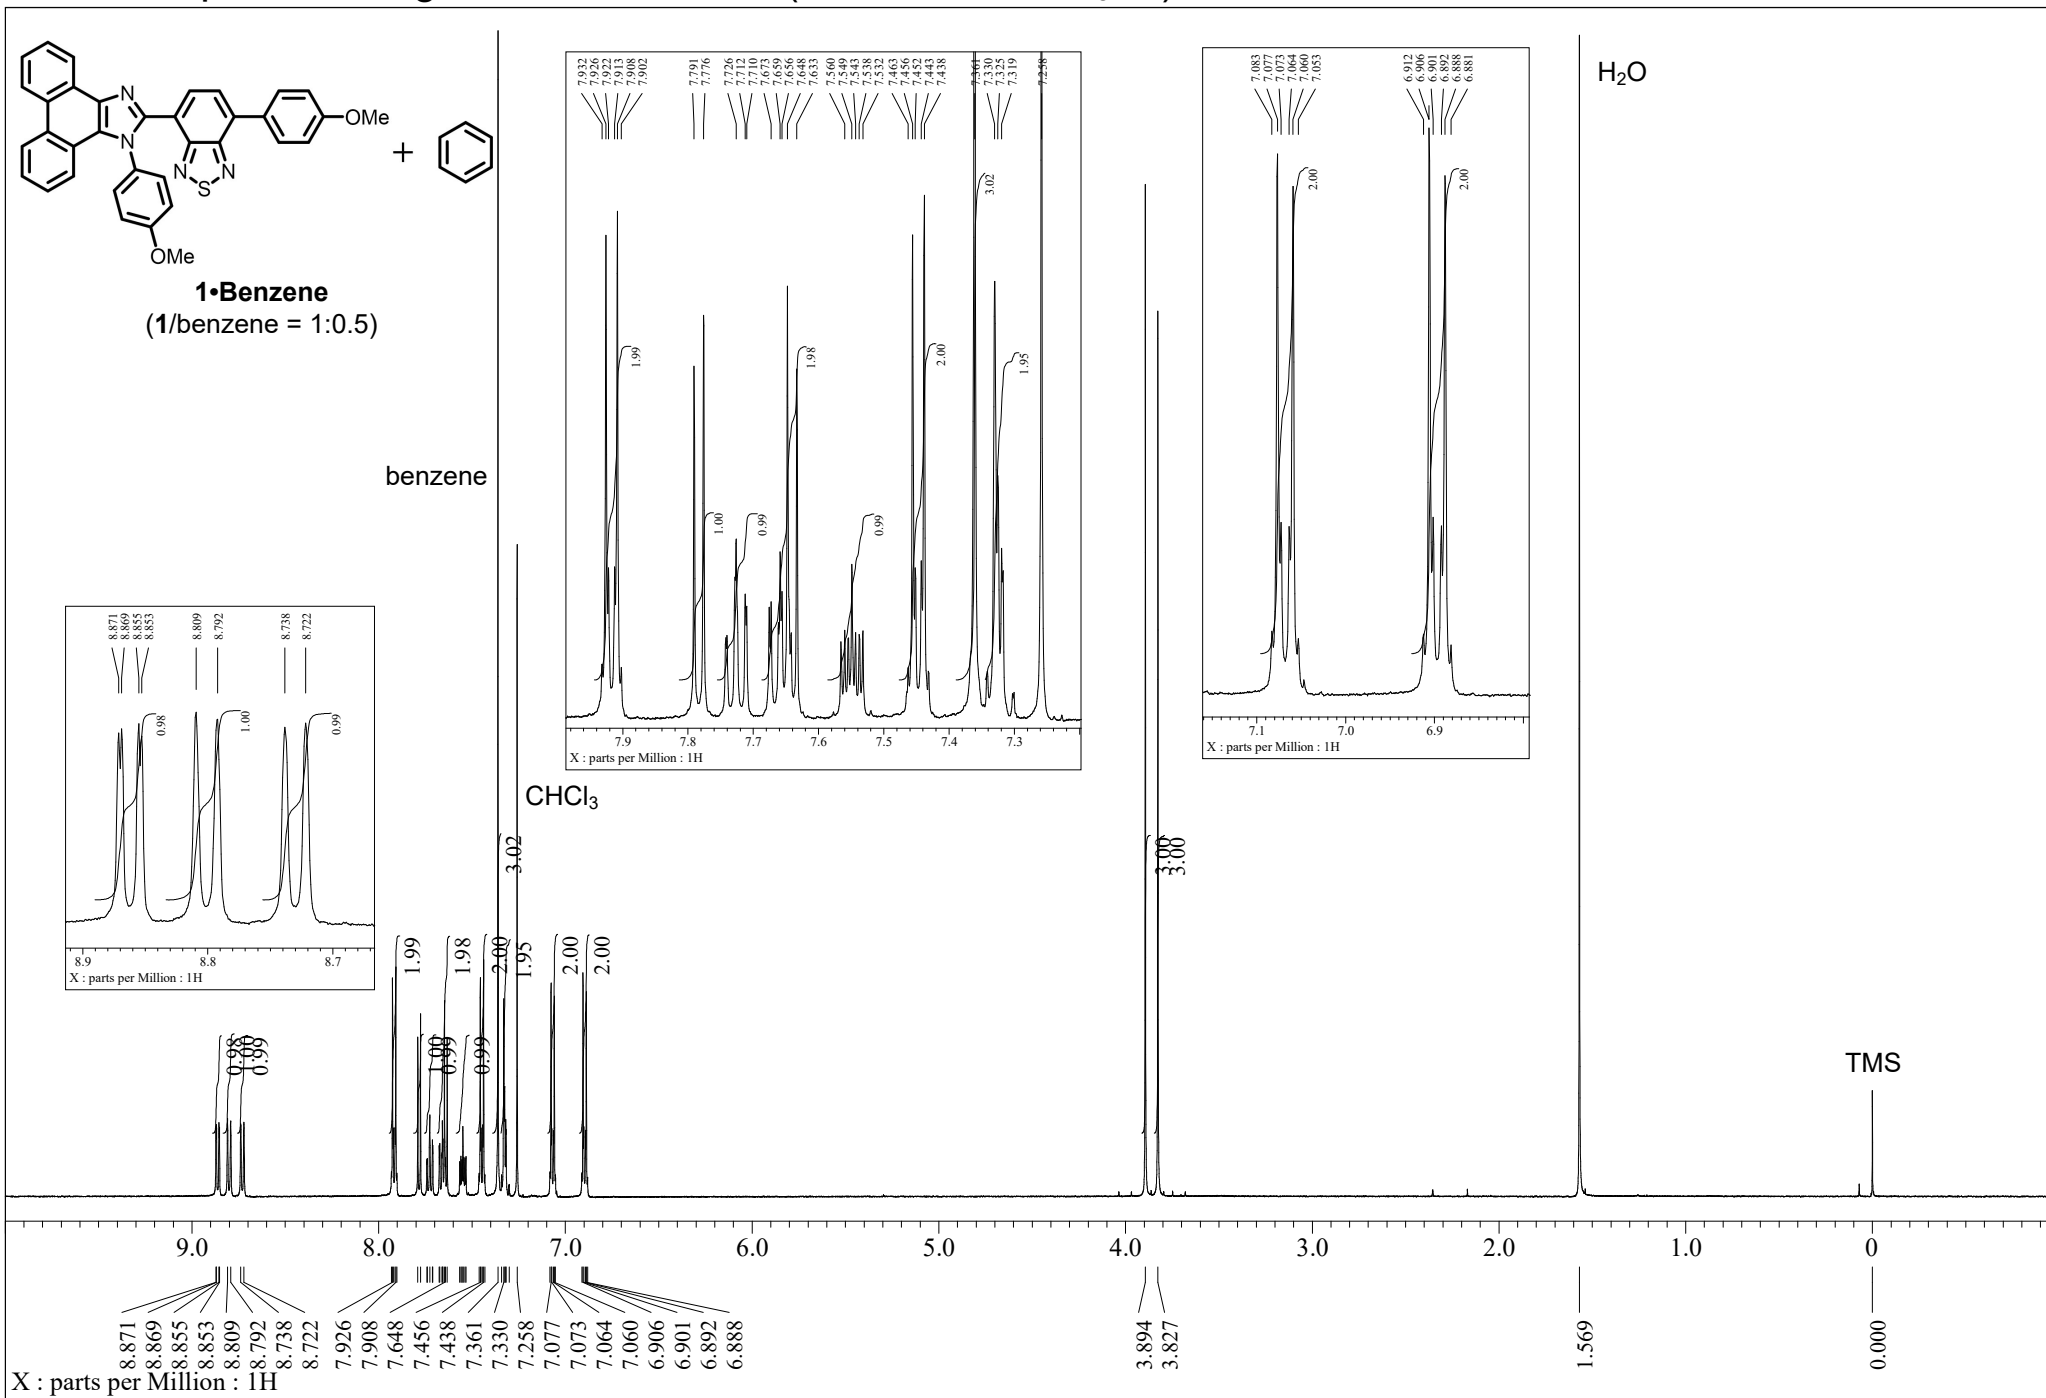

# $^1\text{H}$ NMR spectrum of **1•Pyridine** (500 MHz, $\text{CDCl}_3$ , rt)

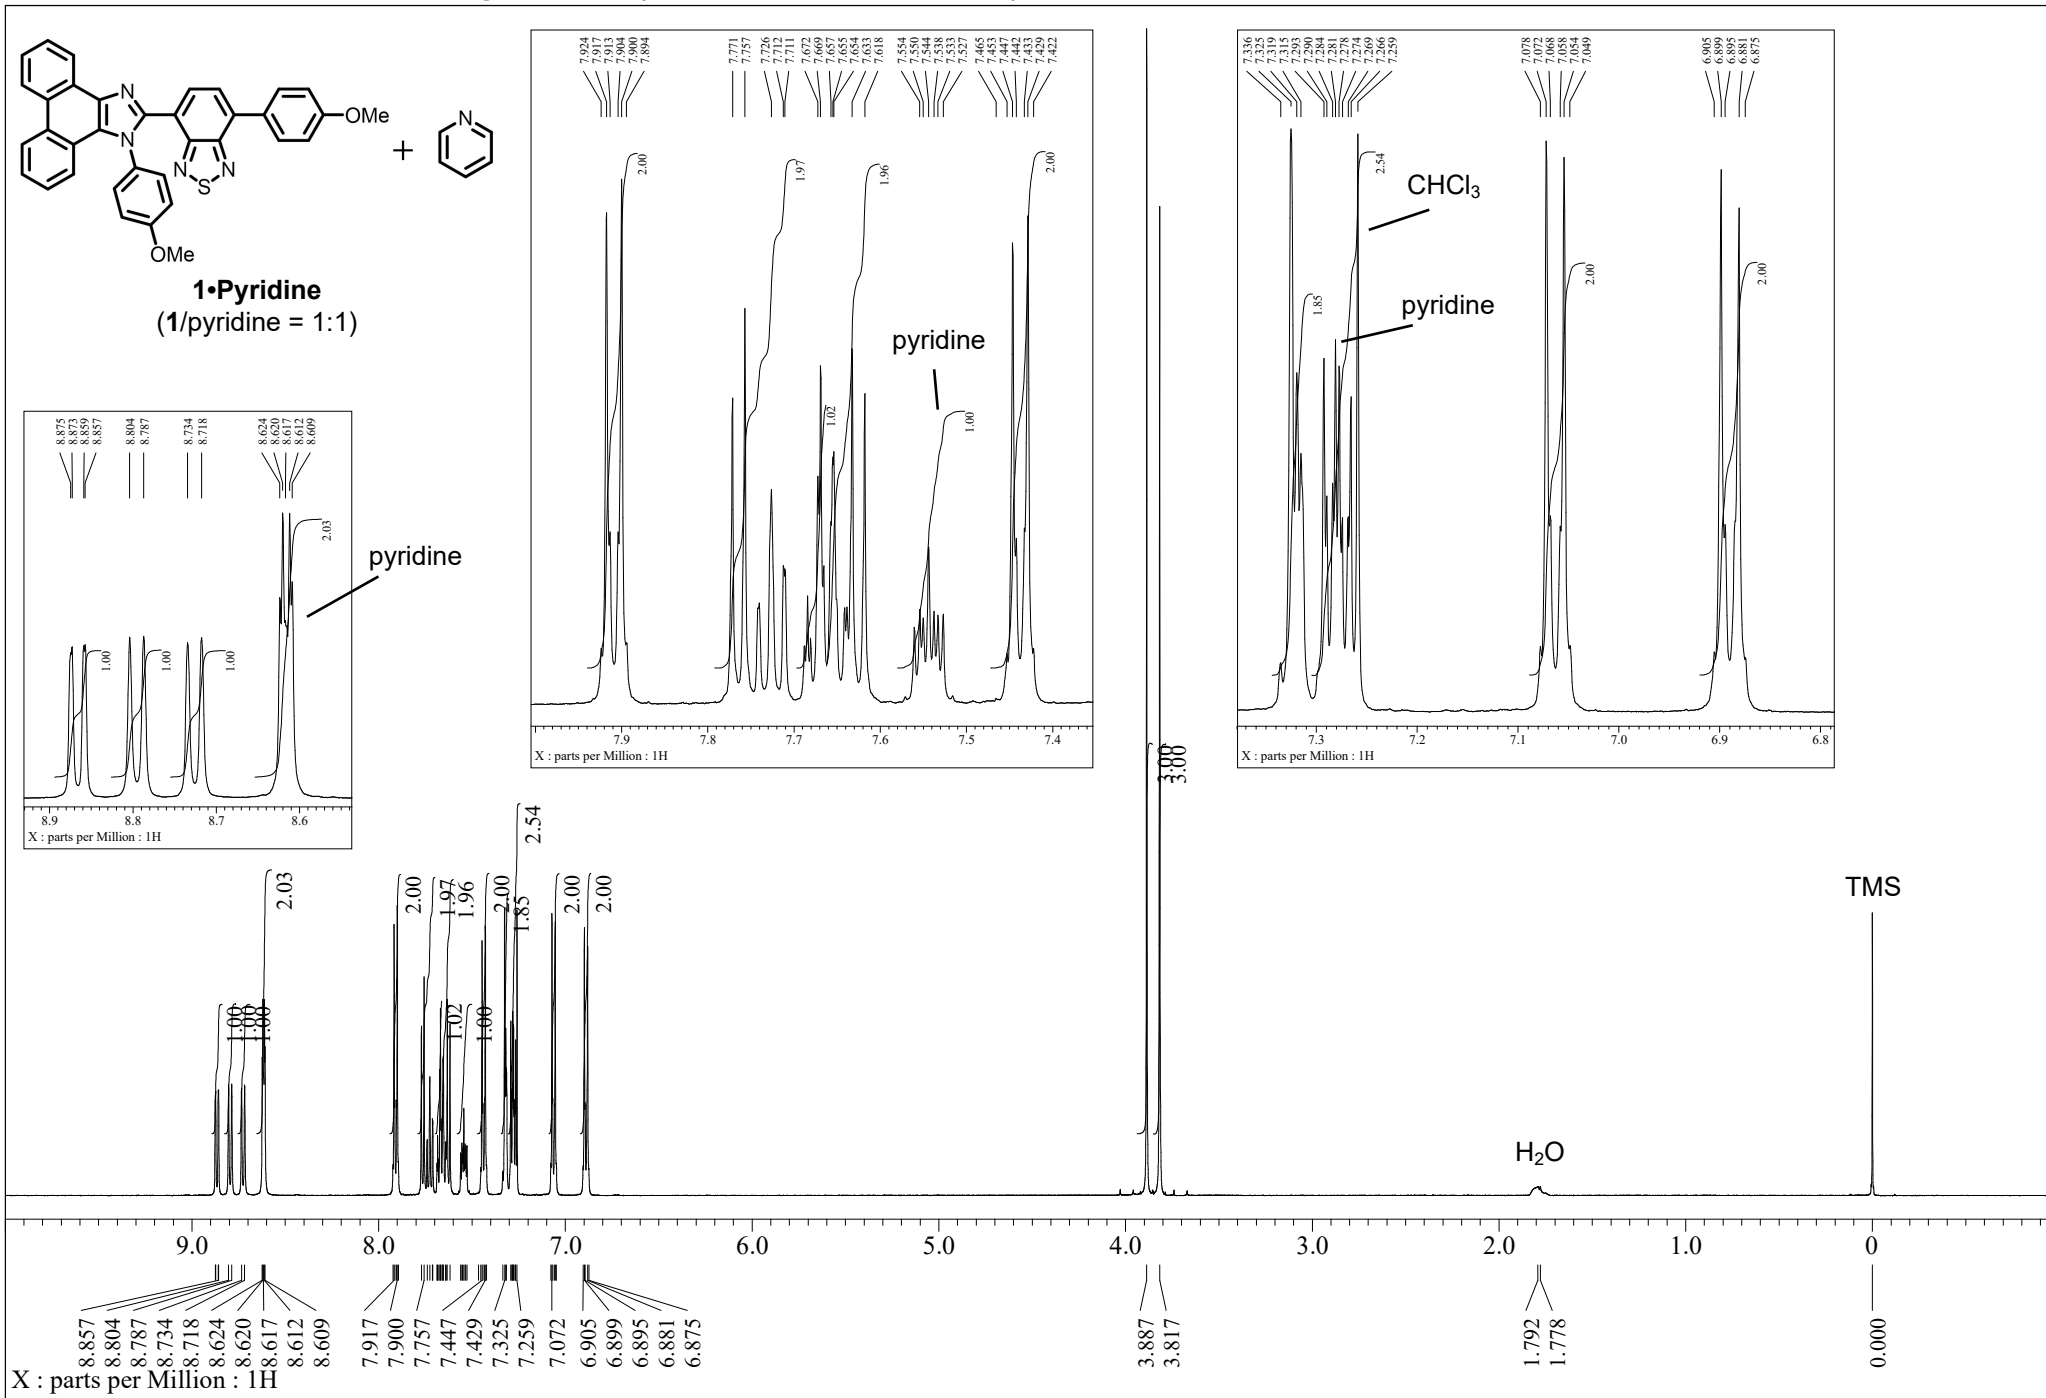

# $^1\text{H}$ NMR spectrum of **1**•AcOEt (500 MHz, $\text{CDCl}_3$ , rt)

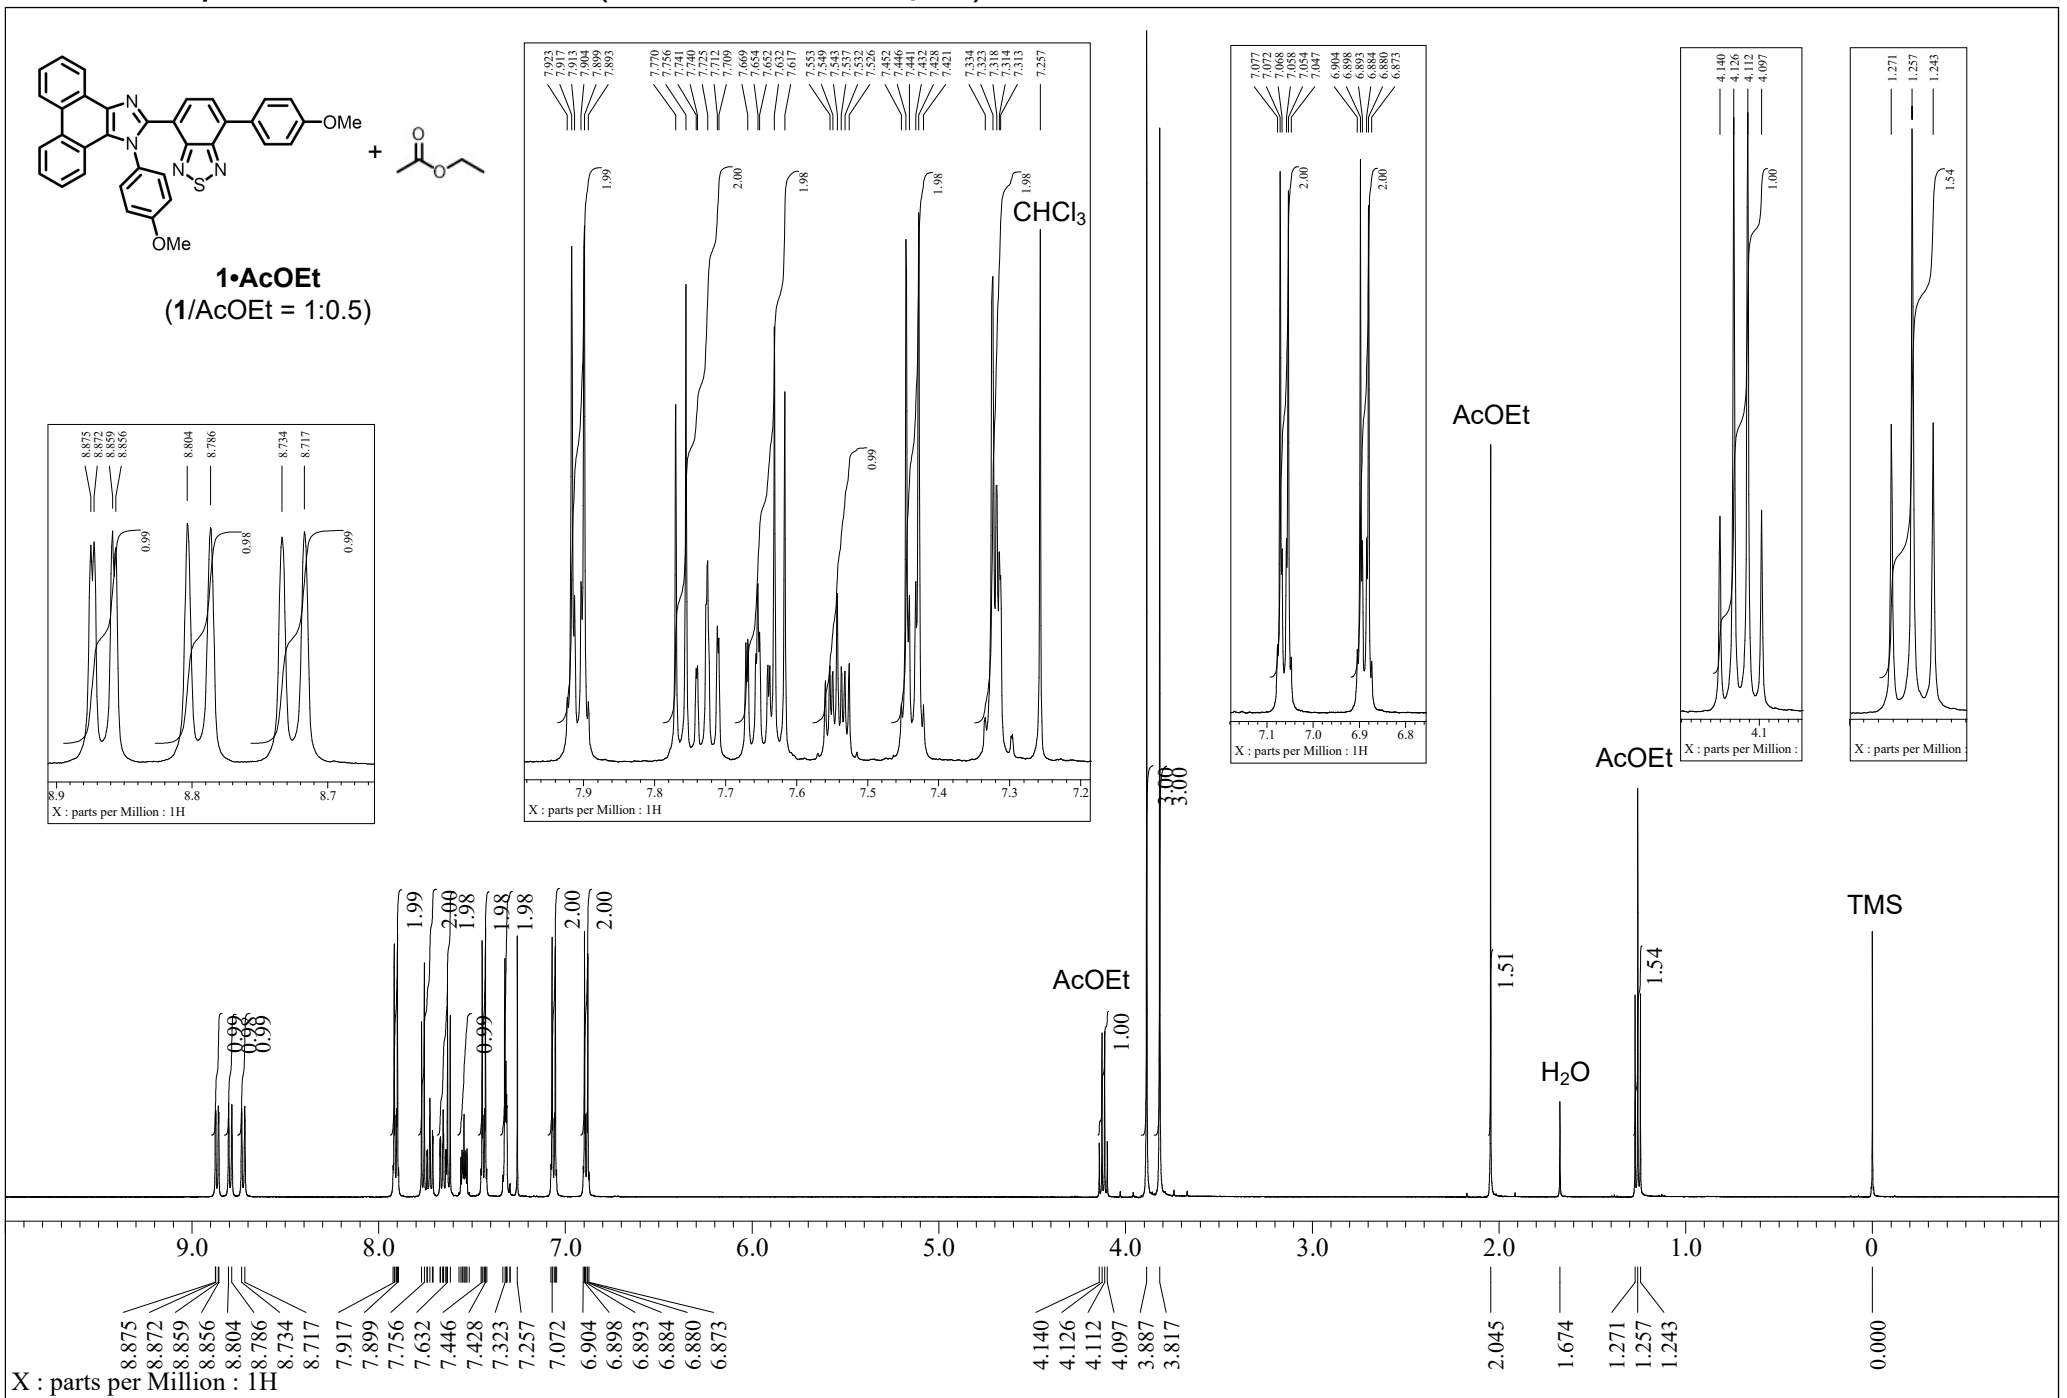

<sup>1</sup>H NMR spectrum of **2** (500 MHz, CDCl<sub>3</sub>, rt)

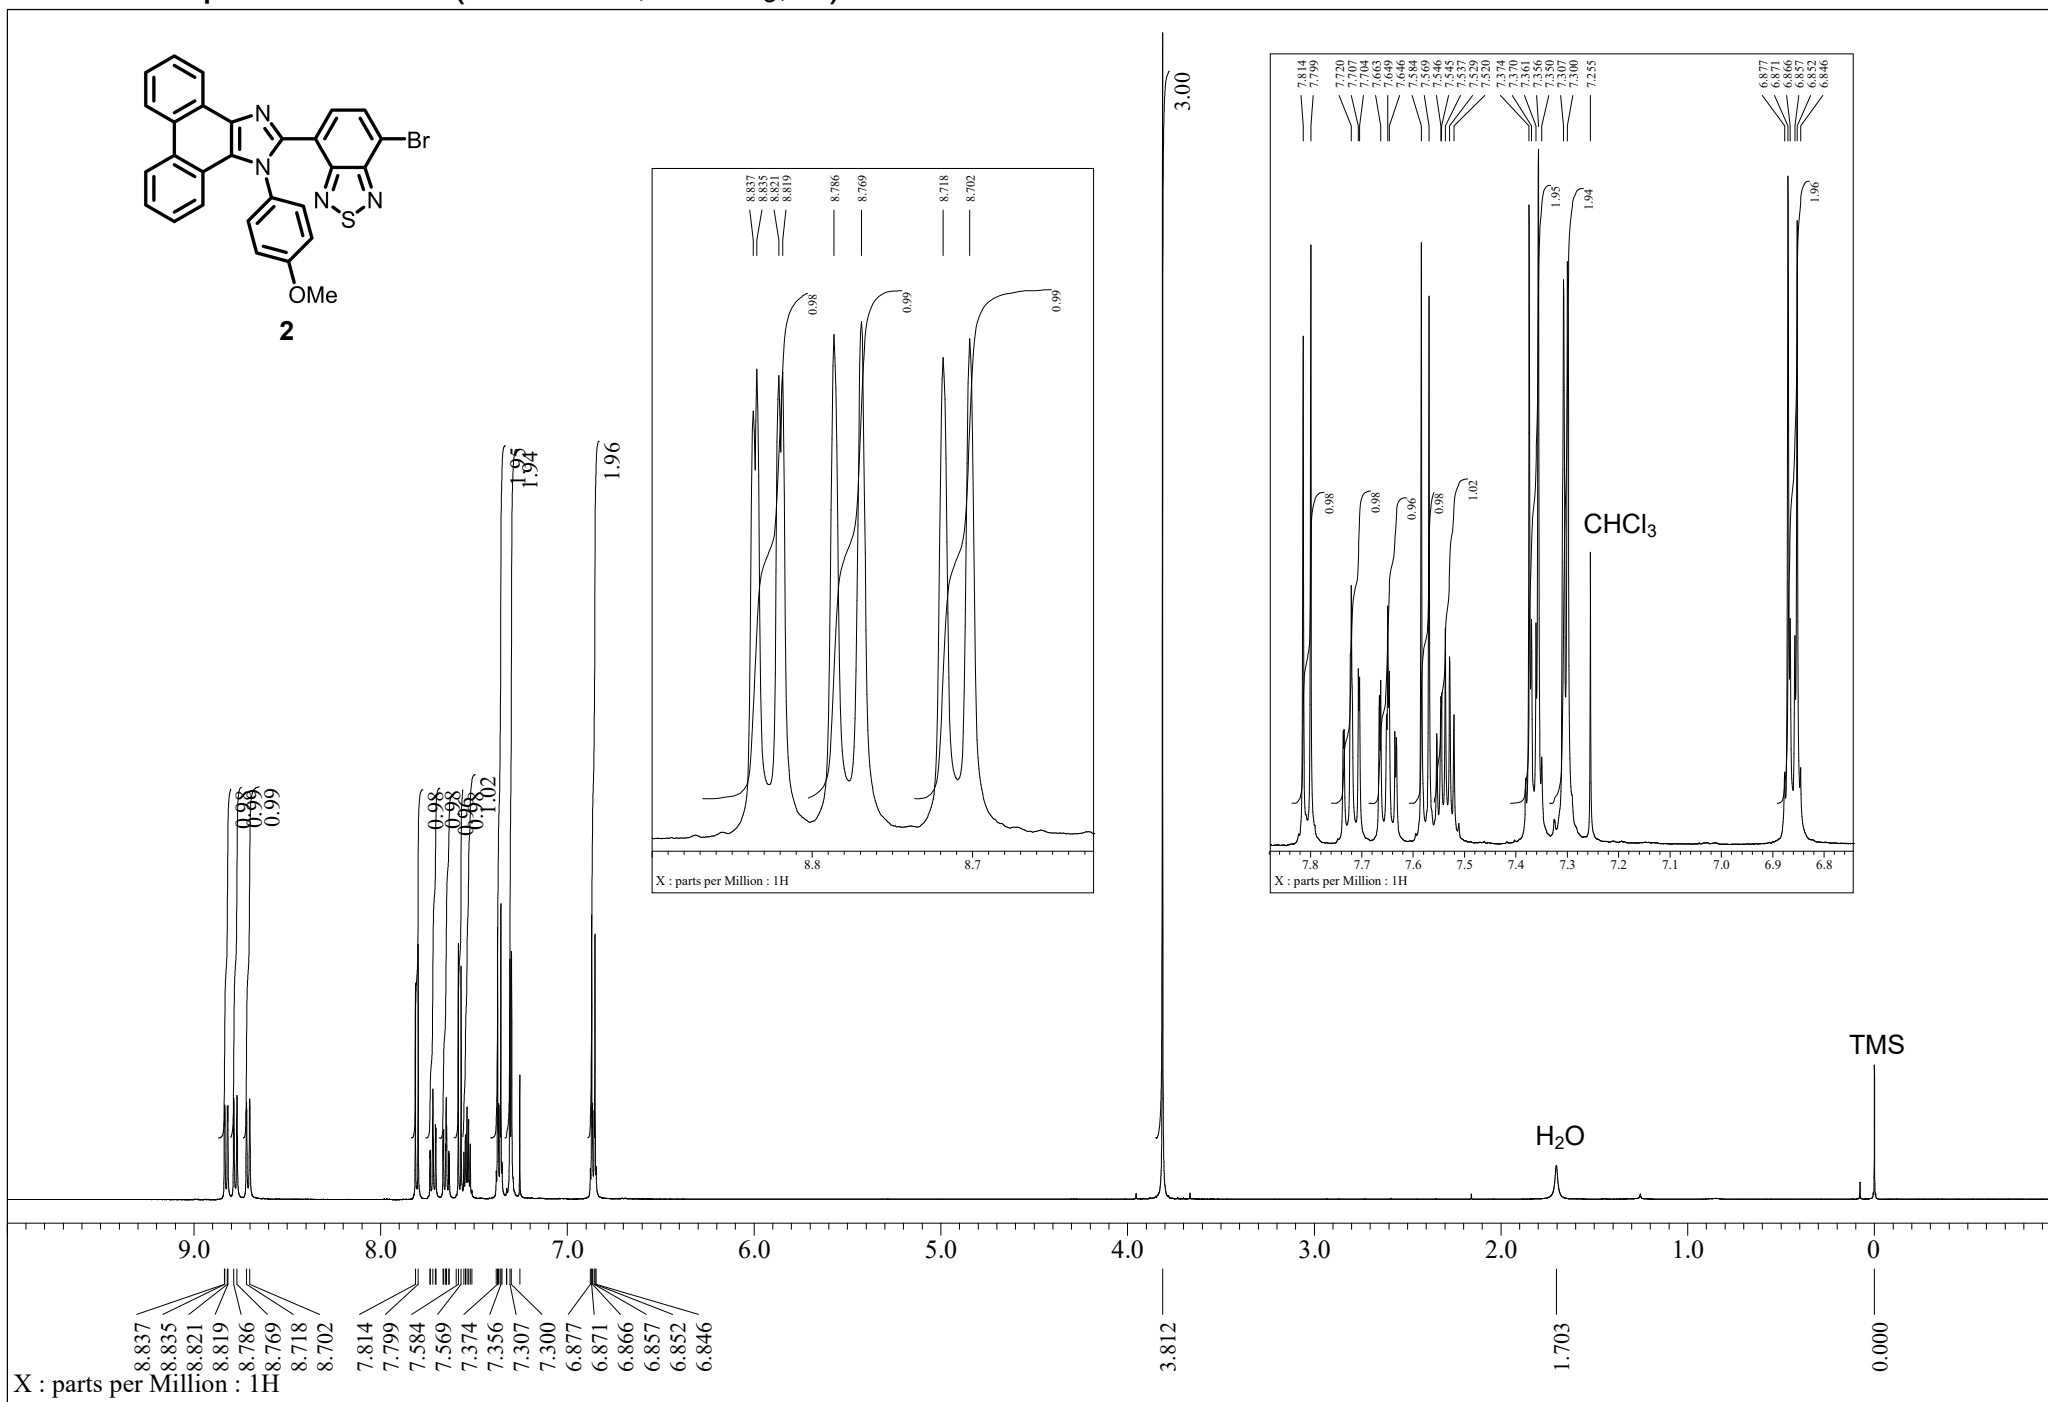



<sup>13</sup>C NMR spectrum of **1** (126 MHz, CDCl<sub>3</sub>, rt)

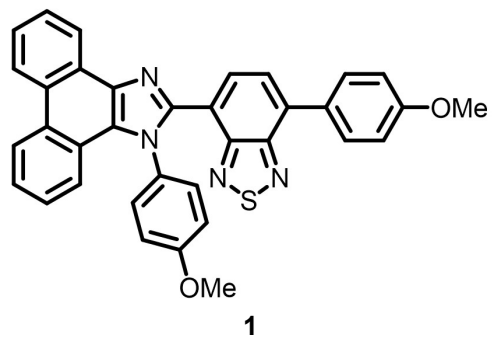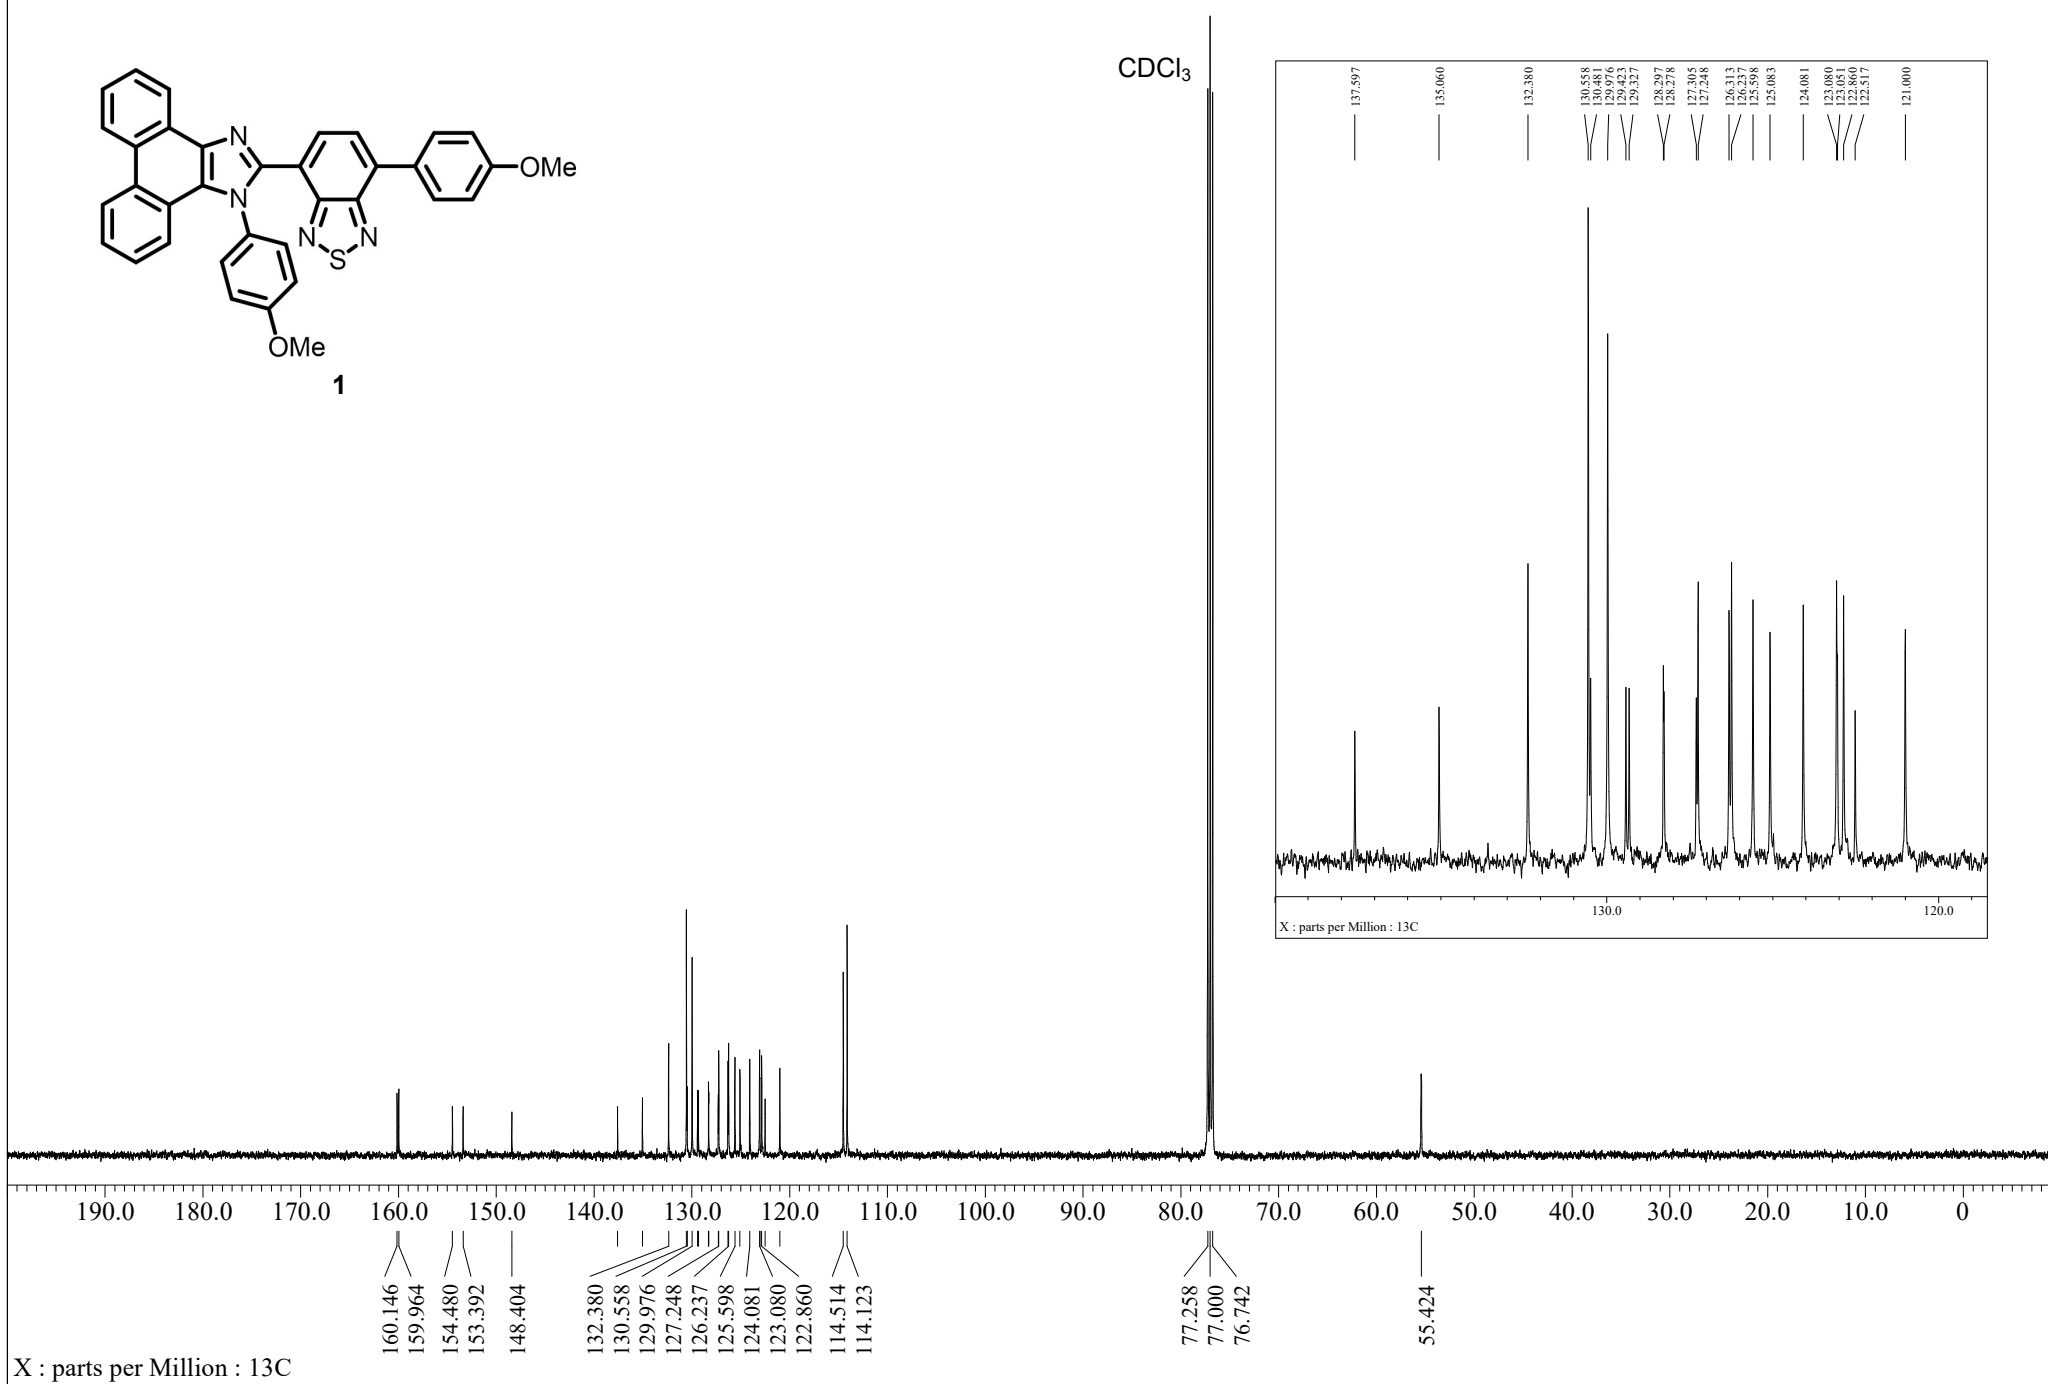

<sup>13</sup>C NMR spectrum of **2** (126 MHz, CDCl<sub>3</sub>, rt)

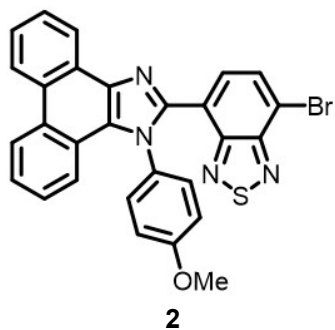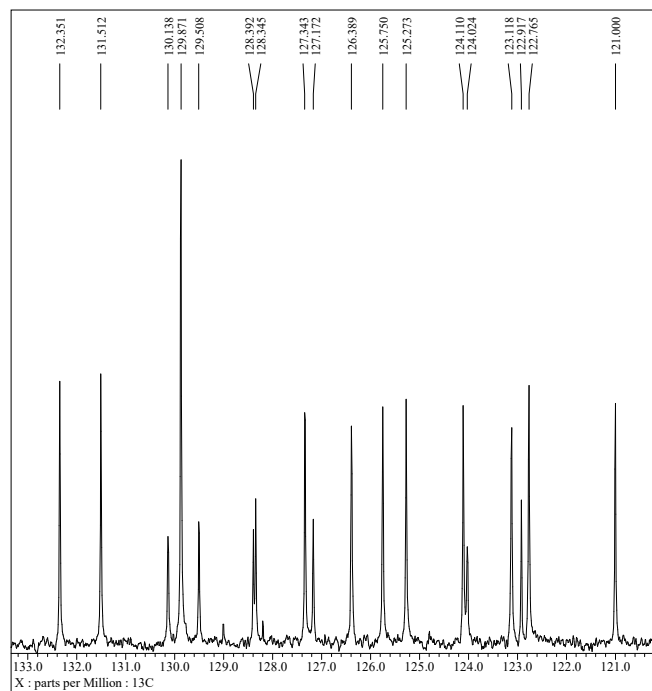

CDCl<sub>3</sub>

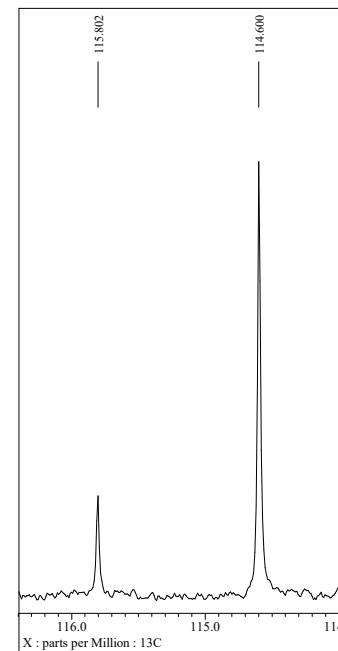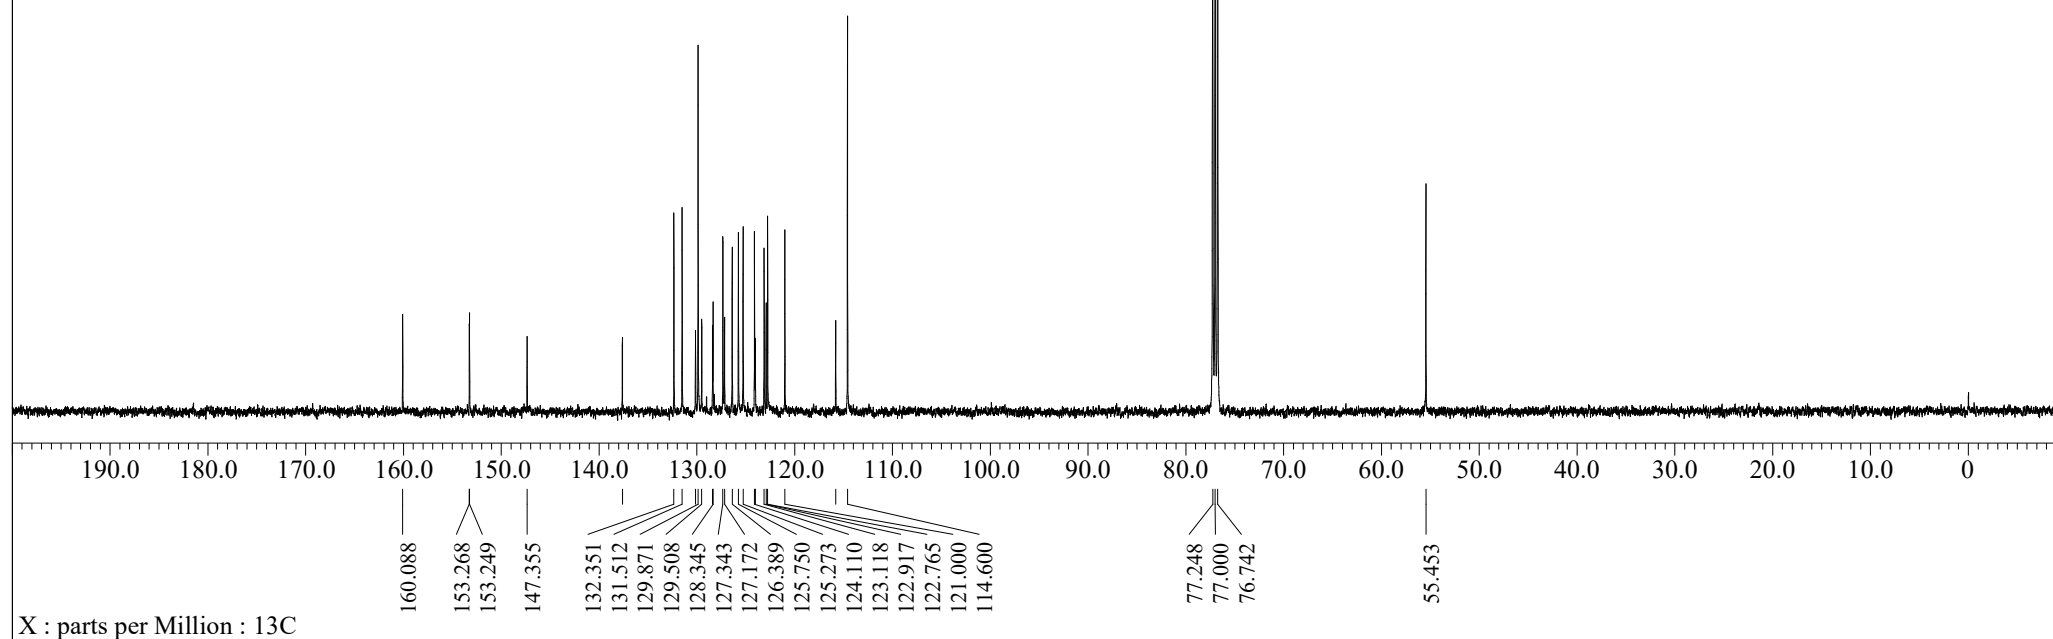

Supplement: d2ce01705a1.pdf [file d2ce01705a1.pdf]
